1  
2  
3  
4  
5  
6  
7  
8  
9  
10  
11  
12  
13  
14  
15  
16  
17  
18  
19  
20  
21  
22  
23

A new technique for use in the study of the microbiome: An evaluation of a three-dimensional cell culture technique in maintaining the gastrointestinal microbiome of four Balb/c female mice and implications for future studies

Maintaining the integrity of an explant microbiome and implications for future studies

Everest Uriel Castaneda<sup>1,2</sup>, Jeff Brady<sup>1</sup>, Janice Speshock<sup>2</sup>

<sup>1</sup>Texas A&M AgriLife Research and Extension Center, Stephenville, Texas, United States of America

<sup>2</sup>Department of Biological Sciences, Tarleton State University, Stephenville, Texas, United States of America

\*Corresponding author

Email: [Speshock@Tarleton.edu](mailto:Speshock@Tarleton.edu)

24  
25  
26  
27  
28  
29  
30  
31  
32  
33  
34  
35  
36  
37  
38  
39  
40  
41  
42  
43  
44  
45

## Abstract (Level 1)

Fluctuations in oxygen, pH, nutrients, or other factors such as food or pharmaceuticals, may perturb the microbiota of the gastrointestinal (GI) tract. This environmental variation is a cause for concern given dysbiosis of the microbiome is correlated with disease states; thereby, model organisms are utilized to study microbial communities during, after, or before shifts in microbes since intact *ex vivo* microbiomes have historically been challenging to utilize. The objective of this study is to culture an explant microbiome of 4 Balb/c, laboratory bred mice to develop an *ex vivo* tool for future microbiome studies. We cultured homogenates of the distal colon of 4 mice in three dimensional, 24 well plate culture dishes. These dishes were incubated for 24 hours in two different oxygen concentration levels, 0% and 20%. The pH of the plate was tested before and after incubation. To analyze the integrity of the microbiome, we utilized 16S sequencing. Further, we utilized 16S metagenomics to characterize fecal samples and colon samples to speculate whether future studies may utilize feces in constructing an explant microbiome to spare animal lives. We found that pH and familial relationship had a profound impact on community structure while oxygen did not have a significant influence. The feces and the colon were similar in community profiles, which lends credence to utilizing feces in future studies. In addition, our efforts successfully cultured archaea, which included difficult to culture strains such as Miscellaneous Crenarchaeota group (MCG) and Methanobacteria. Ultimately, further attempts to culture and preserve an animal's microbiome needs to control for and maintain stable pH.

46

## Introduction (Level 1)

47 The microbiome forms a symbiotic relationship with its host [1]. Essentially, microbes have a  
48 cooperative role in the GI tract and contribute to a host's immune system and metabolism [2–5].  
49 Although the natural relationship between the microbiome and the host is essential,  
50 overpopulation by an undesirable species, or dysbiosis, has been linked to particular diseases and  
51 phenomena such as autism spectrum disorder [6], cancer [3], and obesity [7]. Historically,  
52 researchers have utilized animal models such as gnotobiotic mice to study microbiome-animal  
53 interactions but experimentation with such mice is expensive [8–10]. Thus, an *ex-vivo* model of  
54 the microbiome that provides cost-effective, reproducible, and reliable results is highly desirable  
55 in studying this dynamic [11].

56 Mouse microbiome studies have expanded our views on the impact of prokaryotes on digestion,  
57 disease, and even behavior, but many microbial species cannot persist in culture [12,13];  
58 therefore, most research currently relies on germ-free mice for microbiome studies, which can be  
59 cost-prohibitive for many laboratories [7,8,14]. To further assess this transient mixture of  
60 microbiota [15], scientists have been utilizing culture independent, next-generation sequencing to  
61 inquire about shifts within the microbiome and what stimuli affect these changes in composition  
62 [16]. With the decreasing cost of next-generation sequencing, an influx of research has been  
63 possible in this area [17]. It is worth noting the financial and ethical burden of raising,  
64 sacrificing, and housing model organisms [9,10]; therefore, it would be beneficial to develop  
65 techniques to save organisms and further decrease costs.

66 In this study, we cultured and maintained the GI microbiomes of 4 laboratory-bred female Balb/c  
67 mice in three-dimensional (3D) well plates, partitioned into 2 oxygen levels. Due to the variable

68 nature of the oxygen levels of the GI tract [18], we cultured 3D plates in both a conventional  
69 incubator and an anaerobic chamber, both at 37 degrees Celsius. Additionally, we determined the  
70 microbial composition of the mouse stool and the distal colon to observe if future studies may  
71 utilize feces and avoid sacrificing organisms altogether. We utilized sequencing methods to  
72 verify final proportional community composition of each sample.

## 73 **Materials and Methods (Level 1)**

### 74 **Subjects (Level 2)**

75 The study was performed under a protocol approved by the Tarleton State University  
76 Institutional Animal Care and Usage Committee (Animal Use Protocol 12-009-2016-A1). 4  
77 Balb/c females 8 weeks in age were utilized in this experiment. Females were housed together  
78 and raised on identical chow diets and similarly weaned. Mice 1 and 2 were siblings while mice  
79 3 and 4 were siblings. The siblings were born from different dams and sires. All mice were held  
80 in sterile containers and euthanized with 150  $\mu$ L of sodium pentobarbital delivered  
81 intraperitoneally. Post injection, mice shed two to three samples of stool which were recovered  
82 utilizing sterile forceps and immediately frozen. Once deceased, 2.5 cm of the large distal colon  
83 were removed. After, two to three small additional 0.5 cm samples of the large distal colon were  
84 excised from the specimen and immediately frozen. Colon tissue extractions were added to a  
85 sterile tissue grinder along with 5 mL of Dulbecco's Modified Eagle Medium (DMEM). The  
86 sample was manually homogenized into a liquid solution. Homogenate was checked for pH by  
87 applying a small droplet with a mechanical pipette onto litmus paper.

### 88 **Culture method (Level 2)**

89 Cultures were established in sterile 24 well plates with multiwell tissue culture inserts, 8  $\mu$ m pore  
90 size (Corning Incorporated, New York). Corning PuraMatrix Peptide Hydrogel was prepared  
91 using 8 mL of molecular grade water and 20 ml of hydrogel to create a 0.25% solution. 150 mL  
92 of the prepared solution were added to each of the 12 well inserts. In addition, 500 mL of  
93 supplementary DMEM was added under each well insert. This technique is a modified version of  
94 3D tissue culture repurposed for culturing our *ex-vivo* microbiome. Once the 3D culture plates  
95 were prepared, 250 mL of the homogenized colon were added to each of the prepared 12 well  
96 inserts. Plates were checked for baseline pH by transferring a small drop of medium with a  
97 mechanical pipette onto litmus paper. The plates were then added to a single incubator, but to  
98 create an anoxic environment, half of the plates were incubated in an anaerobic chamber. Plates  
99 were incubated for 24 hours. Each insert's medium was then tested for pH again and transferred  
100 into sterile 2.5 mL storage tubes and frozen for future DNA extraction.

## 101 **DNA extraction and library production (Level 2)**

102 DNA was extracted from each sample using a solid phase extraction protocol from Brady et al.  
103 [19]. After extraction, DNA was amplified utilizing prokaryote-specific primers, 519F 5'-  
104 CAGCMGCCGCGGTAA-3') and 785R (5'- TACNVGGGTATCTAATCC-3'), that target the  
105 V4 region of the 16Ss rRNA [20,21]. PCR amplification was accomplished through denaturation  
106 at 95°C for 3 minutes, followed by 35 cycles of 95°C for 10 seconds, 55°C for 30 seconds, and  
107 72°C for 30 seconds. Dual 6 bp DNA barcodes were added to sequencing libraries using the  
108 same PCR protocol and Illumina P5 and P7 flowcell binding adapters [22]. Sequencing libraries  
109 were size-selected with a Pippin Prep instrument (Sage Science, Beverly, MA) to a length of  
110 300-600 base pairs. Sequencing was conducted on a MiSeq instrument using 600 cycle paired  
111 end v3 sequencing kits at the Texas A&M University Genomics Core Facility. Raw sequences

112 were processed with QIIME [23] and USEARCH [24]. Taxonomy was assigned using the  
113 Greengenes 13.8 database [25] as a reference with UCLUST [24], and reference-based  
114 Operational Taxonomic Unit (OTU) picking was conducted at 97% sequence similarity using the  
115 RDP [26] method in QIIME.

## 116 **Statistical analysis (Level 2)**

117 Cumulative Sum Scaling [27] was utilized to normalize the data. Biom files were constructed  
118 with QIIME [28] and transferred into R [29] and Microsoft Excel for further statistical analysis.  
119 Phyloseq [30], ggplot2 [31], and vegan [32] packages were utilized to evaluate alpha and beta  
120 diversity with seed set at 1400. Alpha diversity was assessed using the Shannon diversity index.  
121 Variation in alpha diversity for oxygen, pH, mouse, feces, and colon comparisons were first  
122 checked for normality using the Shapiro-Wilk test for normality [33]. The data was non-normal  
123 in distribution (Shapiro-Wilk test,  $w=0.9506$ ,  $p<0.01$ ); therefore, comparisons were made with  
124 non-parametric tests. All multivariate tests were corrected using false discovery rate (FDR) [29].  
125 Comparisons of alpha diversity were conducted using Kruskal Wallis one-way analysis of  
126 variance (KW ANOVA) and Wilcoxon rank sums test (Wilcoxon test) while comparisons of beta  
127 diversity were assessed with unweighted unifrac distance metrics at 1000 permutations using  
128 permutational multivariate analysis of variance (PERMANOVA). Dunn's test, post-hoc analysis  
129 was conducted using the `dunn.test` package in R [34]. In addition, non-parametric t-tests were  
130 used for comparisons of mean abundance in individual bacterial strains between samples.  
131 Principle coordinate analysis (PCoA) and canonical correspondence analysis (CCA) were  
132 performed at the level of OTU using unweighted unifrac distance metrics. PRIMER 7 [35] was  
133 used for the hypothesis testing utilizing square root transformed Bray-Curtis ordination data at  
134 9999 permutations. A microbial network was constructed using the Co-occurrence Network

135 Interferences (CoNet) [36] application for Cytoscape [37]. Feces and colon data were removed  
136 before CoNet analysis. CoNet has been utilized in previous studies to investigate defined  
137 interactions between microbes [38–40]. Spearman correlation coefficient with a cutoff ratio of  
138 0.6 was utilized, and to focus the network, only microbes with sequence counts greater or equal  
139 to 20 were included. 1,000 permutations were accomplished through a bootstrapping method  
140 with an FDR correction [39].

## 141 Results (Level 1)

### 142 pH and oxygen (Level 2)

143 pH readings of each plate were taken before and after incubation. As shown in Table 1, pH  
144 fluctuated from the original homogenate and baseline (before 24-hour incubation). In addition,  
145 mouse samples maintained varying levels of pH which correlated with differences in oxygen  
146 concentration (Table 1).

147 **Table 1. Sample size, pH, and oxygen level.**

| Mouse | Homogenate pH | Sample Size | Oxygen Level | Plate Baseline pH | Plate Final pH |
|-------|---------------|-------------|--------------|-------------------|----------------|
| M1    | 7.5           | 12          | 20%          | 8                 | 10             |
|       |               | 11          | 0%           | 8                 | 9              |
| M2    | 7.5           | 11          | 20%          | 8                 | 10             |
|       |               | 12          | 0%           | 8                 | 9              |
| M3    | 7.5           | 12          | 20%          | 8                 | 7              |
|       |               | 11          | 0%           | 8                 | 6              |
| M4    | 7.5           | 12          | 20%          | 8                 | 7              |
|       |               | 12          | 0%           | 8                 | 6              |

148

### 149 16s rRNA sequencing results (Level 2)

150 We analyzed microbiomes from the 4 mice at varying oxygen levels after culturing them *in vitro*.  
151 In the 24 well plate system, we utilized 12 membrane inserts to culture the microbiomes. After  
152 mice succumbed to euthanasia, colon samples were harvested to complement fecal shedding.  
153 Mouse 1, 2, and 4 shed two fecal samples each while mouse 3 shed three fecal samples;  
154 therefore, we had a total of 9 colon and 9 fecal samples across 4 mice. After sequence quality  
155 filtering we had a total sample size of 111 samples and 3,133,666 sequences total (Table 2).

156 **Table 2. Total sample size and sequence count per mouse.**

| Mouse | Sample Size | Total Sequence Count | Average Sequence Count |
|-------|-------------|----------------------|------------------------|
| M1    | 27          | 234051               | 8669                   |
| M2    | 27          | 384215               | 14230                  |
| M3    | 29          | 1243981              | 40128                  |
| M4    | 28          | 1194017              | 45924                  |

157

## 158 **Fecal and colon comparison (Level 2)**

159 The feces and the colon samples were characterized for microbial composition at the phylum and  
160 family level (Figs 1A and 1B, respectively). Community composition was dominated by the  
161 phyla Firmicutes and Bacteroidetes (Fig 1A), with means of 47% and 49%, respectively, and  
162 standard deviations (SD) of 23%. In addition, the *Bacteroidales* family S24-7 was highly  
163 abundant with a mean of 42% and a SD of 20% (Fig 1B). These results are consistent with recent  
164 microbiome studies of mice [41–43]. Beta diversity analysis for each of the feces and colon  
165 samples showed no difference in composition (Table 3), and alpha diversity analysis (Fig 1C)  
166 also revealed no difference (KW ANOVA, chi-squared = 6.64, df = 7, p = 0.47). Therefore, all  
167 colon samples were pooled together, and all feces samples were pooled together for a statistical  
168 comparison of feces and colon. The Shannon diversity index was utilized for comparison of the



169 bulk samples (Fig 1D). Results showed no difference between the feces and colon (Wilcoxon  
170 test,  $p = 0.44$ ). In addition, beta diversity comparison showed no difference (PERMANOVA,  
171 Pseudo F = 1.06,  $p = 0.37$ ). Since we found that feces and colon samples are similar, we pooled  
172 sequences from all feces and colon samples together into one bulk sample, named “microbiome,”  
173 for diversity comparisons with cultured microbiomes.

174 **Table 3. Results of the pairwise PERMANOVA tests between feces and colon samples.**

| Comparison           | Pseudo F | p-score |
|----------------------|----------|---------|
| M1 Feces vs M2 Feces | 3.16     | 0.32    |
| M1 Feces vs M3 Feces | 2.75     | 0.34    |
| M1 Feces vs M4 Feces | 2.60     | 0.31    |
| M2 Feces vs M3 Feces | 3.15     | 0.33    |
| M2 Feces vs M4 Feces | 2.8      | 0.34    |
| M3 Feces vs M4 Feces | 3.01     | 0.30    |
| M1 Colon vs M2 Colon | 1.47     | 0.34    |
| M1 Colon vs M3 Colon | 1.46     | 0.34    |
| M1 Colon vs M4 Colon | 1.40     | 0.33    |
| M2 Colon vs M3 Colon | 1.39     | 0.31    |
| M2 Colon vs M4 Colon | 1.29     | 0.33    |
| M3 Colon vs M4 Colon | 1.41     | 0.33    |

175

176 **Fig 1. Community composition of fecal and colon samples.** (A) Relative abundance of  
177 bacterial phyla. Phyla with observations less than 1% are pooled into “Other” category. The first  
178 two characters represent the mouse from which the organ and stool were dissected. “S” denotes  
179 the different samples acquired. (B) Relative abundance of bacterial families. Families with  
180 observations less than 1% are pooled into “Other” category (C) Comparison of Shannon  
181 diversity between feces and colon samples. “ns” means non-significant,  $p > 0.05$ . (D) Shannon  
182 diversity comparison of pooled feces and colon samples.

### 183 **Microbiome comparison (Level 2)**

184 In the explanted microbiomes, Firmicutes and Bacteroidetes were the dominant phyla (Fig 2A).

185 Firmicutes had the highest average relative abundance, 70% (SD 28%), with Bacteroidetes

186 averaging 18% (SD 16%). Across all cultures, *Enterococcus* was highly abundant (Fig 2B)

187 having a mean of 47% (SD 32%). The Shannon diversity index was different between the

188 explanted cultures and the microbiome of the mice (KW ANOVA, chi-squared = 73.58, df = 8, p  
189 < 0.01). Post-hoc analysis shows that, compared to the microbiome, mouse cultures 1 and 2 were  
190 the same while mouse cultures 3 and 4 differed (Fig 2C). The microbial profile of each sample  
191 revealed a difference in beta diversity between the plates and the microbiome (Table 4), which is  
192 also reflected in the PCoA plot (Fig 2D).

193 **Table 4. Results of the pair-wise PERMANOVA tests between cultured plates and**  
194 **harvested samples.**

| Comparison           | Pseudo F | p-score  |
|----------------------|----------|----------|
| M1 0% vs Microbiome  | 11.09    | p < 0.01 |
| M1 20% vs Microbiome | 18       | p < 0.01 |
| M2 0% vs Microbiome  | 11.93    | p < 0.01 |
| M2 20% vs Microbiome | 15.21    | p < 0.01 |
| M3 0% vs Microbiome  | 14.94    | p < 0.01 |
| M3 20% vs Microbiome | 7.95     | p < 0.01 |
| M4 0% vs Microbiome  | 18.83    | p < 0.01 |
| M4 20% vs Microbiome | 21.321   | p < 0.01 |

195

196 **Fig 2. Community composition of cultures and comparison of microbiome.** (A) Relative  
197 abundance between bacteria Phyla. Phyla with observations less than 1% are pooled into “Other”  
198 category. The first two characters represent the mouse, and the percent oxygen used in culture  
199 conditions is noted. (B) Relative abundance of bacterial genera. Genera with observations less  
200 than 5% are pooled into “Other” category. (C) Results of the post-hoc, Shannon Diversity,  
201 pairwise comparisons between cultures and the microbiome. p<0.05 is noted by “\*”, p<0.0001 is  
202 noted by “\*\*\*\*”, and non-significance is noted by “ns.” (D) Unweighted unifracs PCoA plot for  
203 plates and microbiome comparison. 12 well plates are denoted by the mouse in which they were  
204 derived from, “M,” and the percent oxygen.

## 205 **Environmental variables (Level 2)**

206 A community profile of cultural composition due to varying levels of oxygen and pH was  
207 constructed at the phylum and genus levels (Fig 3A-D). No difference in alpha diversity existed  
208 between the two oxygen levels (Wilcoxon test, p = 0.34; Fig 3E). Results showed similarity in  
209 beta diversity (PERMANOVA, Pseudo F = 1.25, p = 0.21). Multivariate analysis shows a  
210 significant difference in alpha diversity associated with differences in pH (KW ANOVA, chi-

211 squared = 58.13, df = 3,  $p < 0.01$ ). Post-hoc analysis revealed that plates reaching a pH of 6 and  
 212 7 were similar while all other comparisons differed (Fig 3F). Comparisons of microbial  
 213 communities also showed a marked difference between plates of varying pH levels (Table 5).  
 214 Additionally, CCA and PERMANOVA revealed that oxygen did not contribute to community  
 215 clustering (Table 6; Fig 4).

216 **Table 5. Results of the pairwise PERMANOVA test between pH groups.**

| Comparison    | Pseudo F | p-score    |
|---------------|----------|------------|
| pH 6 vs pH 7  | 1.86     | 0.04       |
| pH 6 vs pH 9  | 17.15    | $p < 0.01$ |
| pH 6 vs pH 10 | 25.46    | $p < 0.01$ |
| pH 7 vs pH 9  | 15.27    | $p < 0.01$ |
| pH 7 vs pH 10 | 22.31    | $p < 0.01$ |
| pH 9 vs pH 10 | 1.62     | 0.03       |

217

218 **Table 6. Hypothesis testing for sources of variation based on PERMANOVA analysis.**

| Source                        | df | SS         | MS     | Pseudo F | P(perm) | Unique perms |
|-------------------------------|----|------------|--------|----------|---------|--------------|
| Oxygen                        | 1  | 3432.6     | 3432.6 | 1.6677   | 0.0756  | 9903         |
| Sibling Relationship          | 1  | 52930      | 52930  | 25.716   | 0.0001  | 9921         |
| Oxygen x Sibling Relationship | 1  | 2407.4     | 2407.4 | 1.1696   | 0.2437  | 9915         |
| Residuals                     | 89 | 1.8319E+05 | 2058.3 |          |         |              |
| Total                         | 92 | 2.4194E+05 |        |          |         |              |

df, degrees of freedom; SS, sum of squares; MS, mean square.

The only significant effect fitted in the PERMANOVA is sibling relationship (fixed factor) while oxygen (fixed factor) is not significant. Sibling relationship explains the changes in community composition as time elapsed in the incubators.

219

220 **Fig 3. Microbial structuring due to environmental factors.** (A) Relative abundance between  
 221 bacteria phyla. Phyla with observations less than 1% are pooled into “Other” category. (B)  
 222 Relative abundance of bacterial genera. Genera with observations less than 1% are pooled into  
 223 “Other” category. (C) Shannon diversity comparison between oxygen concentrations. Non-  
 224 significance is shown by “ns.”

225 **Fig 4. CCA for the effects of pH, oxygen, and sibling relationship on community**  
226 **structuring.**

227 **Siblings (Level 2)**

228 A marked difference in cultural composition was noted by familial relationship (Table 6, Fig 4,  
229 Fig 5A, B). Not only was clustering associated with siblings, shown in Fig 4, but Shannon  
230 diversity significantly varied (KW ANOVA, chi-squared = 56.24, df = 3,  $p < 0.01$ ). Post-hoc  
231 analysis showed mouse 1 and mouse 2 were similar and varied from mouse 3 and mouse 4,  
232 which were also similar (Fig 5C). Additionally, beta diversity varied according to familial  
233 relationship (PERMANOVA, Pseudo F = 12.82,  $p < 0.01$ ).

234 **Fig 5. Microbial composition by mouse.** (A) Relative abundance between bacteria phyla. Phyla  
235 with observations less than 1% are pooled into “Other” category. (B) Relative abundance at the  
236 level of genus. Observations less than 0.03% are pooled into “Other” category. (C) Shannon  
237 diversity index comparison using mouse 2 as a reference group. “\*\*\*\*\*” means significance  
238  $p < 0.0001$  while “ns” means non-significant.

239 **Individual Strain Comparisons (Level 2)**

240 *Enterococcus* significantly increased between mice cultures and the microbiome (Fig 6A).  
241 Additionally, Proteobacteria strains were more abundant in cultures reaching a high pH;  
242 although, cultures reaching pH 6 were equivalent in Proteobacteria compared to cultures  
243 reaching pH 9 (Fig 6B). *Enterococcus* strains also followed a similar dynamic in which they  
244 increased in cultures reaching a lower pH, 6 and 7 (Fig 6C). Subsequently, cultures with the  
245 lowest pH, 6, had a significantly high abundance of *Lactobacillus* (Fig 6D). Archaea were more  
246 abundant in plates with pH 9 and 10 (Fig 6E), and further, *Clostridium* strains were more likely  
247 to be present in mouse 1 and 2 cultures compared to mouse 3 and 4 (Fig 6F).

248 **Fig 6. Comparison barcharts of individual microbial taxa.** (A) Comparison of the mean  
249 abundance of *Enterococcus* in cultured plates compared to the microbiome. (B) Comparison of  
250 the mean abundance of Proteobacteria in samples with varying pH. (C) Comparison of mean

251 abundance of *Enterococcus* in samples with varying pH. (D) Comparison of mean abundance of  
252 *Lactobacillus* in samples with varying pH. (E) Comparison in mean abundance of archaea in  
253 samples with varying pH. (F) Comparison in mean abundance of *Clostridium* in cultures  
254 partitioned by which mouse, M, it originated. “ns”, non significant; “\*\*\*”,  $p < 0.001$ ; “\*\*”,  $p <$   
255  $0.01$ ; “\*”,  $p \leq 0.05$ .

## 256 **Microbial network (Level 2)**

257 The OTUs in the microbial network represent 88% of the relative sequence count for the cultured  
258 well plates (Fig 7). Much of the interactions were positive in nature meaning copresence in a  
259 shared-niche is the most abundant interaction type. Negative, mutually exclusive interactions are  
260 only between OTUs from the genus *Enterococcus* and several OTUs from the order  
261 Bacteroidales (Fig 7). The interaction between the 4 mutually exclusive OTUs account for 50%  
262 of all sequences.

263 **Fig 7. Microbial network generated using Spearman’s rank correlation at the taxonomic**  
264 **level of genus.** Most of the edges, 54 of 58, are of a positive correlation. The rest are negative.  
265 Nodes sizes are configured based on abundance. Nodes greater than or equal 10% are the largest,  
266 intermediate sized nodes are greater than or equal to 1%, and the smallest nodes are less than  
267 1%.

## 268 **Discussion (Level 1)**

269 Many studies of the microbiome utilize germ-free mice, which are expensive to house and breed  
270 and require sacrificing animals to study the GI microbiome [14,16]. In this study, we attempted  
271 to culture an *ex vivo* microbiome in 3D well plates to decrease the cost associated with studying  
272 animal microbiomes. We found that cultures for mouse 1 and 2 were comparable to the gut  
273 microbiome in Shannon diversity (Fig 2C), which is very promising. Ultimately, our explant  
274 microbiome was significantly different than the *in vivo* microbiome, but we were able to culture  
275 a diverse number of prokaryotic strains utilizing our method. Optimizing efforts in culture  
276 media, detection, and atmospheric gradients is extremely important in culturing desired microbes

277 [44]. With very little optimization, we were able to culture many gut microbial species including  
278 difficult to culture strains such as Methanobacteria [45], mean of 0.57 (SD 4.31), and MCG [46],  
279 mean of 218.59 (SD 633.71), which included the fecal B10 strain [47], (Fig 6E).

280 The upsurge of *Enterococcus* in cultured plates (Fig 6A) is explained by its competitiveness  
281 outlined in Fig 7. A likely scenario is that *Enterococcus* outcompeted strains within the order  
282 Bacteroidales, which makes up a high proportion of the gut microbiome [48,49]. *Enterococcus* is  
283 a facultative anaerobe [50] that may respire aerobically in the presence of hemin using  
284 cytochrome *bd* terminal oxidase, which reduces oxygen into water [51,52]. Since it is a known  
285 pioneer colonizer of the GI tract, its presence possibly established and maintained the anoxic  
286 environment by metabolically depleting the atmospheric oxygen, which allowed obligate  
287 anaerobes to thrive [53,54].

288 Post-incubation, a shift in pH was seen amongst the various 12 wells of the plates (Table 1). This  
289 shift in pH is accounted for by the increase in gram negative Proteobacteria in plates with a more  
290 basic pH (Fig 6B). Creation of the amine groups from this phylum perhaps led to the increase in  
291 pH [55–57]. Further, the decrease in pH may be related to the increase in the lactic acid  
292 fermenter *Enterococcus* in plates with a pH of 7 (Fig 6C) [52] while plates with a pH of 6 may  
293 be partially explained by the increase in both *Enterococcus* and *Lactobacillus* (Fig 6C, D)  
294 [52,58,59]. Additionally, pH was a strong influencer in the growth of archaea. Archaea grew  
295 more readily in plates with a higher pH (Fig 6E). Not only are archaea difficult to culture, but  
296 also their diversity is not well studied in regard to the gut microbiome [60]. Results are  
297 comparable to those of Ilhan et al. wherein pH had a strong influence on microbial composition  
298 in fecal anaerobic cultures [59]. There was a possible interaction between differences in the  
299 microbial communities seeding the culture plates and physio-chemical culture conditions causing

300 the pH in plates from different mice to swing in opposite directions. Additionally, culturing  
301 plates in an anaerobic chamber instead of a CO<sub>2</sub> incubator may have exacerbated pH instability  
302 [61]. Future efforts to stabilize pH may allow for additional growth of archaea and provide a  
303 means to temporarily culture and study members that have in the past been recalcitrant to culture  
304 methods.

305 The microbiome is passed on from mother to litter [8,62]. Our *ex vivo* microbiome was highly  
306 impacted by familial relationship (Table 6, Fig 4). Further, mice differed in the amount of  
307 *Clostridium* cultured. Mouse 1 and 2 had higher numbers of *Clostridium* than mouse 3 and 4 (Fig  
308 7F). Not only were these mice siblings but also weaned by different mothers. The effects of  
309 weaning are similar to Bian et al. wherein the abundance of an unclassified strain of  
310 *Clostridiaceae* was affected by the nursing mother [63]. Our results reiterate the impact of the  
311 mother on the microbiome, but also show this dynamic transfers even when explanted from the  
312 source.

313 Essentially, our results indicate that the feces and large distal colon are highly similar; therefore,  
314 it is reasonable to consider avoiding mouse sacrifice by culturing feces. Future experiments will  
315 need to control pH shifts to avoid media-related population dynamics. Since none of the plates  
316 maintained the original baseline pH or even homogenate pH, we assume that additional buffering  
317 capacity or equilibrating media and culturing in a CO<sub>2</sub> incubator may create a more stable  
318 explanted microbiome, possibly maintaining diversity more similar to *in vivo* microbiota. Even  
319 with the pH swings seen here, we were able to culture bacteria that are difficult to routinely  
320 culture. Ultimately, this study found that pH was a stronger influencer of community  
321 composition than oxygen. pH has a strong influence on the establishment of the microbes that  
322 will populate the explant culture. Future efforts at establishing an *ex vivo* mouse microbiome

323 should include additional measures geared towards stabilizing pH in order to avoid community  
324 shifts related to physical changes in growth media.

## 325 Acknowledgements (Level 1)

326 We would like to thank the staff at Texas A&M Agrilife Research and Extension Center for  
327 aiding in the project, the Tarleton State University Office of Student Research and Creative  
328 Activities and the College of Science and Technology for funding this research, and the Tarleton  
329 State University College of Graduate Studies for the assistantship for Mr. Castaneda.

## 330 References (Level 1)

- 331 1. Luke K Ursell, Jessica L Metcalf, Laura Wegener Parfrey and RK. Defining the Human  
332 Microbiome. *NIH Manuscripts*. 2013;70: 1–12. doi:10.1111/j.1753-  
333 4887.2012.00493.x.Defining
- 334 2. Tourneur E, Chassin C. Neonatal immune adaptation of the gut and its role during  
335 infections. *Clin Dev Immunol*. 2013;2013: 1–17. doi:10.1155/2013/270301
- 336 3. Schwabe R and JC. The microbiome and cancer. *Nat Rev Cancer*. 2013;13: 800–812.  
337 doi:10.1038/nrc3610
- 338 4. Sommer F, Bäckhed F. The gut microbiota — masters of host development and  
339 physiology. *Nat Publ Gr*. 2013;11. doi:10.1038/nrmicro2974
- 340 5. Cho I, Blaser MJ. The human microbiome: At the interface of health and disease. *Nat Rev*  
341 *Genet*. 2012;13: 260–270. doi:10.1038/nrg3182
- 342 6. Li Q, Han Y, Dy ABC, Hagerman RJ. The Gut Microbiota and Autism Spectrum



- 343 Disorders. *Front Cell Neurosci.* 2017;11. doi:10.3389/fncel.2017.00120
- 344 7. Turnbaugh PJ, Bäckhed F, Fulton L, Gordon JI. Diet-Induced Obesity Is Linked to  
345 Marked but Reversible Alterations in the Mouse Distal Gut Microbiome. *Cell Host*  
346 *Microbe.* 2008;3: 213–223. doi:10.1016/j.chom.2008.02.015
- 347 8. Ericsson AC, Franklin CL. Manipulating the gut microbiota: Methods and challenges.  
348 *ILAR J.* 2015;56: 205–217. doi:10.1093/ilar/ilv021
- 349 9. Böhm L, Torsin S, Tint SH, Eckstein MT, Ludwig T, Pérez JC. The yeast form of the  
350 fungus *Candida albicans* promotes persistence in the gut of gnotobiotic mice. *PLoS*  
351 *Pathog.* 2017;13: 1–26. doi:10.1371/journal.ppat.1006699
- 352 10. Hart ML, Ericsson AC, Lloyd KCK, Grimsrud KN, Rogala AR, Godfrey VL, et al.  
353 Development of outbred CD1 mouse colonies with distinct standardized gut microbiota  
354 profiles for use in complex microbiota targeted studies. *Sci Rep.* 2018;8: 1–11.  
355 doi:10.1038/s41598-018-28448-0
- 356 11. Roeselers G, Ponomarenko M, Lukovac S, Wortelboer HM. Ex vivo systems to study  
357 host–microbiota interactions in the gastrointestinal tract. *Best Pract Res Clin*  
358 *Gastroenterol.* 2013;27: 101–113. doi:<https://doi.org/10.1016/j.bpg.2013.03.018>
- 359 12. Lagier JC, Khelaifia S, Alou MT, Ndongo S, Dione N, Hugon P, et al. Culture of  
360 previously uncultured members of the human gut microbiota by culturomics. *Nat*  
361 *Microbiol.* 2016;1. doi:10.1038/nmicrobiol.2016.203
- 362 13. Browne HP, Forster SC, Anonye BO, Kumar N, Neville BA, Stares MD, et al. Culturing  
363 of “unculturable” human microbiota reveals novel taxa and extensive sporulation. *Nature.*

- 364 Nature Publishing Group; 2016;533: 543–546. doi:10.1038/nature17645
- 365 14. Rodriguez-Palacios A, Aladyshkina N, Ezeji JC, Erkkila HL, Conger M, Ward J, et al.  
366 “Cyclical bias” in microbiome research revealed by a portable germ-free housing system  
367 using nested isolation. *Sci Rep. Springer US*; 2018;8: 1–18. doi:10.1038/s41598-018-  
368 20742-1
- 369 15. Trosvik P, de Muinck EJ. Ecology of bacteria in the human gastrointestinal tract--  
370 identification of keystone and foundation taxa. *Microbiome*. 2015;3: 44.  
371 doi:10.1186/s40168-015-0107-4
- 372 16. Goodman AL, Kallstrom G, Faith JJ, Reyes A, Moore A, Dantas G, et al. Extensive  
373 personal human gut microbiota culture collections characterized and manipulated in  
374 gnotobiotic mice. *Proc Natl Acad Sci*. 2011;108: 6252–6257.  
375 doi:10.1073/pnas.1102938108
- 376 17. Shokralla S, Spall JL, Gibson JF, Hajibabaei M. Next-generation sequencing technologies  
377 for environmental DNA research. *Mol Ecol*. 2012;21: 1794–1805. doi:10.1111/j.1365-  
378 294X.2012.05538.x
- 379 18. Zheng L, Kelly CJ, Colgan SP. Physiologic hypoxia and oxygen homeostasis in the  
380 healthy intestine. A Review in the Theme: Cellular Responses to Hypoxia. *Am J Physiol -*  
381 *Cell Physiol*. 2015;309: C350–C360. doi:10.1152/ajpcell.00191.2015
- 382 19. Brady JA, Faske JB, Castañeda-Gill JM, King JL, Mitchell FL. High-throughput DNA  
383 isolation method for detection of *Xylella fastidiosa* in plant and insect samples. *J*  
384 *Microbiol Methods*. Elsevier B.V.; 2011;86: 310–312. doi:10.1016/j.mimet.2011.06.007

- 385 20. Herlemann DPR, Labrenz M, Jürgens K, Bertilsson S, Waniek JJ, Andersson AF.  
386 Transitions in bacterial communities along the 2000 km salinity gradient of the Baltic Sea.  
387 ISME J. 2011;5: 1571–1579. doi:10.1038/ismej.2011.41
- 388 21. Klindworth A, Pruesse E, Schweer T, Peplies J, Quast C, Horn M, et al. Evaluation of  
389 general 16S ribosomal RNA gene PCR primers for classical and next-generation  
390 sequencing-based diversity studies. *Nucleic Acids Res.* 2013;41: 1–11.  
391 doi:10.1093/nar/gks808
- 392 22. Illumina. 16S Metagenomic Sequencing Library Preparation. Illumina.com. 2013; 1–28.  
393 Available: [http://support.illumina.com/content/dam/illumina-](http://support.illumina.com/content/dam/illumina-support/documents/documentation/chemistry_documentation/16s/16s-metagenomic-library-prep-guide-15044223-b.pdf)  
394 [support/documents/documentation/chemistry\\_documentation/16s/16s-metagenomic-](http://support.illumina.com/content/dam/illumina-support/documents/documentation/chemistry_documentation/16s/16s-metagenomic-library-prep-guide-15044223-b.pdf)  
395 [library-prep-guide-15044223-b.pdf](http://support.illumina.com/content/dam/illumina-support/documents/documentation/chemistry_documentation/16s/16s-metagenomic-library-prep-guide-15044223-b.pdf)
- 396 23. Caporaso JG, Lauber CL, Walters WA, Berg-Lyons D, Lozupone CA, Turnbaugh PJ, et  
397 al. Global patterns of 16S rRNA diversity at a depth of millions of sequences per sample.  
398 *Proc Natl Acad Sci.* 2011;108: 4516–4522. doi:10.1073/pnas.1000080107
- 399 24. Edgar RC. Search and clustering orders of magnitude faster than BLAST. *Bioinformatics.*  
400 2010;26: 2460–2461. doi:10.1093/bioinformatics/btq461
- 401 25. DeSantis TZ, Hugenholtz P, Larsen N, Rojas M, Brodie EL, Keller K, et al. Greengenes, a  
402 chimera-checked 16S rRNA gene database and workbench compatible with ARB. *Appl*  
403 *Environ Microbiol.* 2006;72: 5069–5072. doi:10.1128/AEM.03006-05
- 404 26. Cole JR, Wang Q, Cardenas E, Fish J, Chai B, Farris RJ, et al. The Ribosomal Database  
405 Project: Improved alignments and new tools for rRNA analysis. *Nucleic Acids Res.*

- 406 2009;37: 141–145. doi:10.1093/nar/gkn879
- 407 27. Paulson JN, Colin Stine O, Bravo HC, Pop M. Differential abundance analysis for  
408 microbial marker-gene surveys. *Nat Methods*. 2013;10: 1200–1202.  
409 doi:10.1038/nmeth.2658
- 410 28. Caporaso JG, Kuczynski J, Stombaugh J, Bittinger K, Bushman FD, Costello EK, et al.  
411 QIIME allows analysis of high-throughput community sequencing data. *Nat Methods*.  
412 Nature Publishing Group; 2010;7: 335. Available: <http://dx.doi.org/10.1038/nmeth.f.303>
- 413 29. R Core Team. R: A Language and Environment for Statistical Computing [Internet].  
414 Vienna, Austria; 2018. Available: <https://www.r-project.org/>
- 415 30. McMurdie PJ, Holmes S. Phyloseq: An R Package for Reproducible Interactive Analysis  
416 and Graphics of Microbiome Census Data. *PLoS One*. 2013;8.  
417 doi:10.1371/journal.pone.0061217
- 418 31. Wickham H. ggplot2: Elegant Graphics for Data Analysis [Internet]. Springer-Verlag New  
419 York; 2016. Available: <http://ggplot2.org>
- 420 32. Oksanen J, Kindt R, Legendre P, O’Hara B, Simpson GL, Solymos P, et al. vegan:  
421 Community Ecology Package [Internet]. 2008. Available: <http://cran.r-project.org/>,
- 422 33. Yap BW, Sim CH. Comparisons of various types of normality tests. *J Stat Comput Simul*.  
423 2011;81: 2141–2155. doi:10.1080/00949655.2010.520163
- 424 34. Dinno A. dunn.test: Dunn’s Test of Multiple Comparisons Using Rank Sums [Internet].  
425 2017. Available: <https://cran.r-project.org/package=dunn.test>

- 426 35. Clarke KR, Gorley RN. PRIMER v7. 2015;
- 427 36. Faust K, Raes J. CoNet app : inference of biological association networks using Cytoscape  
428 [ version 1 ; referees : 2 approved with reservations ] Referee Status : F1000Research.  
429 2017;1519: 1–14. doi:10.12688/f1000research.9050.1
- 430 37. Shannon P, Markiel A, Owen Ozier 2, Baliga NS, Wang JT, Ramage D, et al. Cytoscape:  
431 a software environment for integrated models of biomolecular interaction networks.  
432 Genome Res. 2003; 2498–2504. doi:10.1101/gr.1239303.metabolite
- 433 38. Barberán A, Bates ST, Casamayor EO, Fierer N. Using network analysis to explore co-  
434 occurrence patterns in soil microbial communities. ISME J. 2012;6: 343–351.  
435 doi:10.1038/ismej.2011.119
- 436 39. Faust K, Sathirapongsasuti JF, Izard J, Segata N, Gevers D, Raes J, et al. Microbial co-  
437 occurrence relationships in the Human Microbiome. PLoS Comput Biol. 2012;8.  
438 doi:10.1371/journal.pcbi.1002606
- 439 40. Roggenbuck M, Bærholm Schnell I, Blom N, Bærlum J, Bertelsen MF, Pontén TS, et al.  
440 The microbiome of New World vultures. Nat Commun. 2014;5: 1–8.  
441 doi:10.1038/ncomms6498
- 442 41. Weldon L, Abolins S, Lenzi L, Bourne C, Riley EM, Viney M. The gut microbiota of wild  
443 mice. PLoS One. 2015;10: 1–15. doi:10.1371/journal.pone.0134643
- 444 42. Kreisinger J, Čížková D, Vohánka J, Piálek J. Gastrointestinal microbiota of wild and  
445 inbred individuals of two house mouse subspecies assessed using high-throughput parallel  
446 pyrosequencing. Mol Ecol. 2014;23: 5048–5060. doi:10.1111/mec.12909

- 447 43. Ormerod KL, Wood DLA, Lachner N, Gellatly SL, Daly JN, Parsons JD, et al. Genomic  
448 characterization of the uncultured Bacteroidales family S24-7 inhabiting the guts of  
449 homeothermic animals. *Microbiome*. *Microbiome*; 2016;4: 1–17. doi:10.1186/s40168-  
450 016-0181-2
- 451 44. Lagier JC, Edouard S, Pagnier I, Mediannikov O, Drancourt M, Raoult D. Current and  
452 past strategies for bacterial culture in clinical microbiology. *Clin Microbiol Rev*. 2015;28:  
453 208–236. doi:10.1128/CMR.00110-14
- 454 45. Khelaifia S, Raoult D, Drancourt M. A Versatile Medium for Cultivating Methanogenic  
455 Archaea. *PLoS One*. 2013;8. doi:10.1371/journal.pone.0061563
- 456 46. Meng J, Xu J, Qin D, He Y, Xiao X, Wang F. Genetic and functional properties of  
457 uncultivated MCG archaea assessed by metagenome and gene expression analyses. *ISME*  
458 *J*. Nature Publishing Group; 2014;8: 650–659. doi:10.1038/ismej.2013.174
- 459 47. Gorlas A, Robert C, Gimenez G, Drancourt M, Raoult D. Complete genome sequence of  
460 *Methanomassiliicoccus luminyensis*, the largest genome of a human-associated Archaea  
461 species. *Journal of Bacteriology*. 2012. p. 4745. doi:10.1128/JB.00956-12
- 462 48. Peterfreund GL, Vandivier LE, Sinha R, Marozsan AJ, Olson WC, Zhu J, et al.  
463 Succession in the Gut Microbiome following Antibiotic and Antibody Therapies for  
464 *Clostridium difficile*. *PLoS One*. 2012;7. doi:10.1371/journal.pone.0046966
- 465 49. Zitomersky NL, Atkinson BJ, Franklin SW, Mitchell PD, Snapper SB, Comstock LE, et  
466 al. Characterization of Adherent Bacteroidales from Intestinal Biopsies of Children and  
467 Young Adults with Inflammatory Bowel Disease. *PLoS One*. 2013;8.

- 468 doi:10.1371/journal.pone.0063686
- 469 50. Fisher K, Phillips C. The ecology, epidemiology and virulence of *Enterococcus*.  
470 *Microbiology*. 2009;155: 1749–1757. doi:10.1099/mic.0.026385-0
- 471 51. Winstedt L, Frankenberg L, Hederstedt L, Von Wachenfeldt C. *Enterococcus faecalis*  
472 V583 contains a cytochrome bd-type respiratory oxidase. *J Bacteriol*. 2000;182: 3863–  
473 3866. doi:10.1128/JB.182.13.3863-3866.2000
- 474 52. Ramsey M, Hartke A, Huycke MM. The Physiology and Metabolism of Enterococci -  
475 PubMed - NCBI. *Enterococci: From Commensals to Leading Causes of Drug Resistant*  
476 *Infection*. 2014. pp. 424–465. Available:  
477 <http://www.ncbi.nlm.nih.gov/pubmed/24649507>  
478 <http://www.ncbi.nlm.nih.gov/books/NBK190424/>
- 479 53. Houghtelling PD. Why is initial bacterial colonization of the intestine important to the  
480 infant's and child's health? *J Pediatr Gastroenterol Nutr*. 2016;60: 294–307.  
481 doi:10.1097/MPG.0000000000000597. Why
- 482 54. Wampach L, Heintz-Buschart A, Hogan A, Muller EEL, Narayanasamy S, Laczny CC, et  
483 al. Colonization and succession within the human gut microbiome by archaea, bacteria,  
484 and microeukaryotes during the first year of life. *Front Microbiol*. 2017;8: 1–21.  
485 doi:10.3389/fmicb.2017.00738
- 486 55. Smith EA, Macfarlane GT. Studies on amine production in the human colon: Enumeration  
487 of amine forming bacteria and physiological effects of carbohydrate and pH. *Anaerobe*.  
488 1996;2: 285–297. doi:10.1006/anae.1996.0037

- 489 56. Busse HJ. Polyamines. *Methods Microbiol.* 2011;38: 239–259. doi:10.1016/B978-0-12-  
490 387730-7.00011-5
- 491 57. Doré J, Blottière H. The influence of diet on the gut microbiota and its consequences for  
492 health. *Curr Opin Biotechnol.* Elsevier Ltd; 2015;32: 195–199.  
493 doi:10.1016/j.copbio.2015.01.002
- 494 58. Gänzle MG, Follador R. Metabolism of oligosaccharides and starch in lactobacilli: A  
495 review. *Frontiers in Microbiology.* 2012. pp. 1–15. doi:10.3389/fmicb.2012.00340
- 496 59. Ilhan ZE, Marcus AK, Kang D, Rittmann BE. pH-Mediated Microbial and Metabolic.  
497 *mSphere.* 2017;2: 1–12. doi:10.1128/mSphere
- 498 60. Raymann K, Moeller AH, Goodman AL, Ochman H. Unexplored Archaeal Diversity in  
499 the Great Ape Gut Microbiome. *mSphere.* 2017;2: e00026-17.  
500 doi:10.1128/mSphere.00026-17
- 501 61. Ueda K, Tagami Y, Kamihara Y, Shiratori H, Takano H, Beppu T. Isolation of bacteria  
502 whose growth is dependent on high levels of CO<sub>2</sub> and implications of their potential  
503 diversity. *Appl Environ Microbiol.* 2008;74: 4535–4538. doi:10.1128/AEM.00491-08
- 504 62. Mueller NT, Bakacs E, Combellick J, Grigoryan Z, Maria G. The infant microbiome  
505 development: mom matters. *Trends Mol Med.* 2015;21: 109–117.  
506 doi:10.1016/j.molmed.2014.12.002.The
- 507 63. Bian G, Ma S, Zhu Z, Su Y, Zoetendal EG, Mackie R, et al. Age, introduction of solid  
508 feed and weaning are more important determinants of gut bacterial succession in piglets  
509 than breed and nursing mother as revealed by a reciprocal cross-fostering model. *Environ*



510 Microbiol. 2016;18: 1566–1577. doi:10.1111/1462-2920.13272

511

(A)

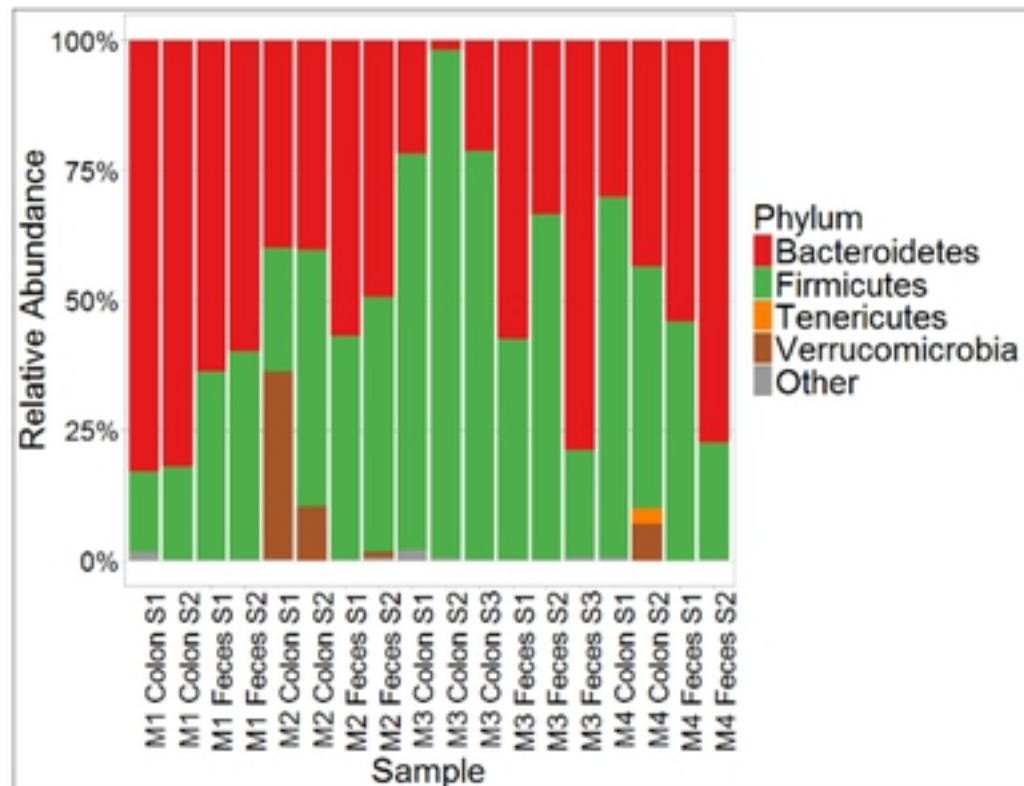

(B)

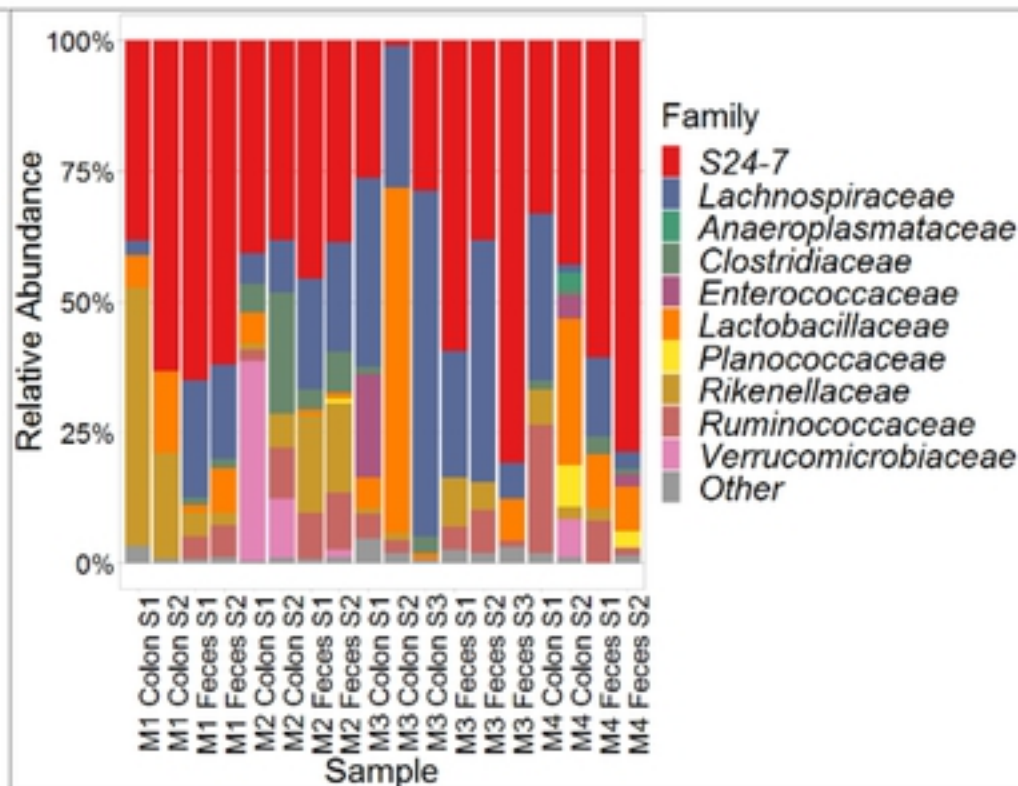

(C)

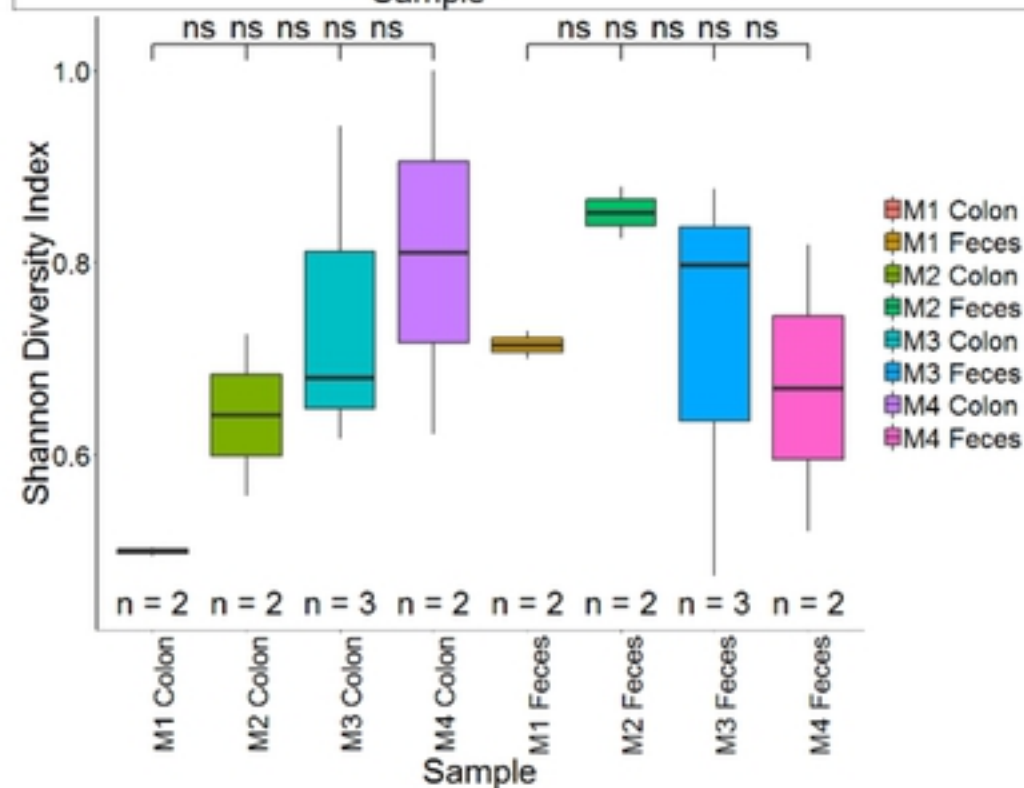

(D)

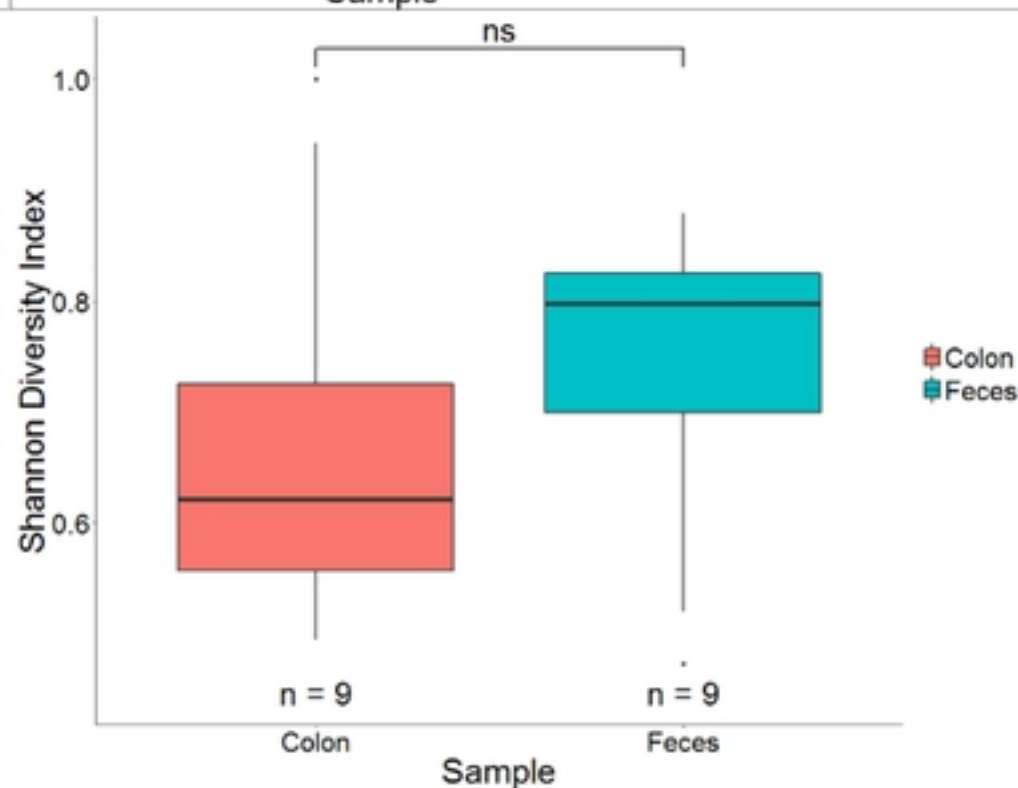

Microbiome inspection

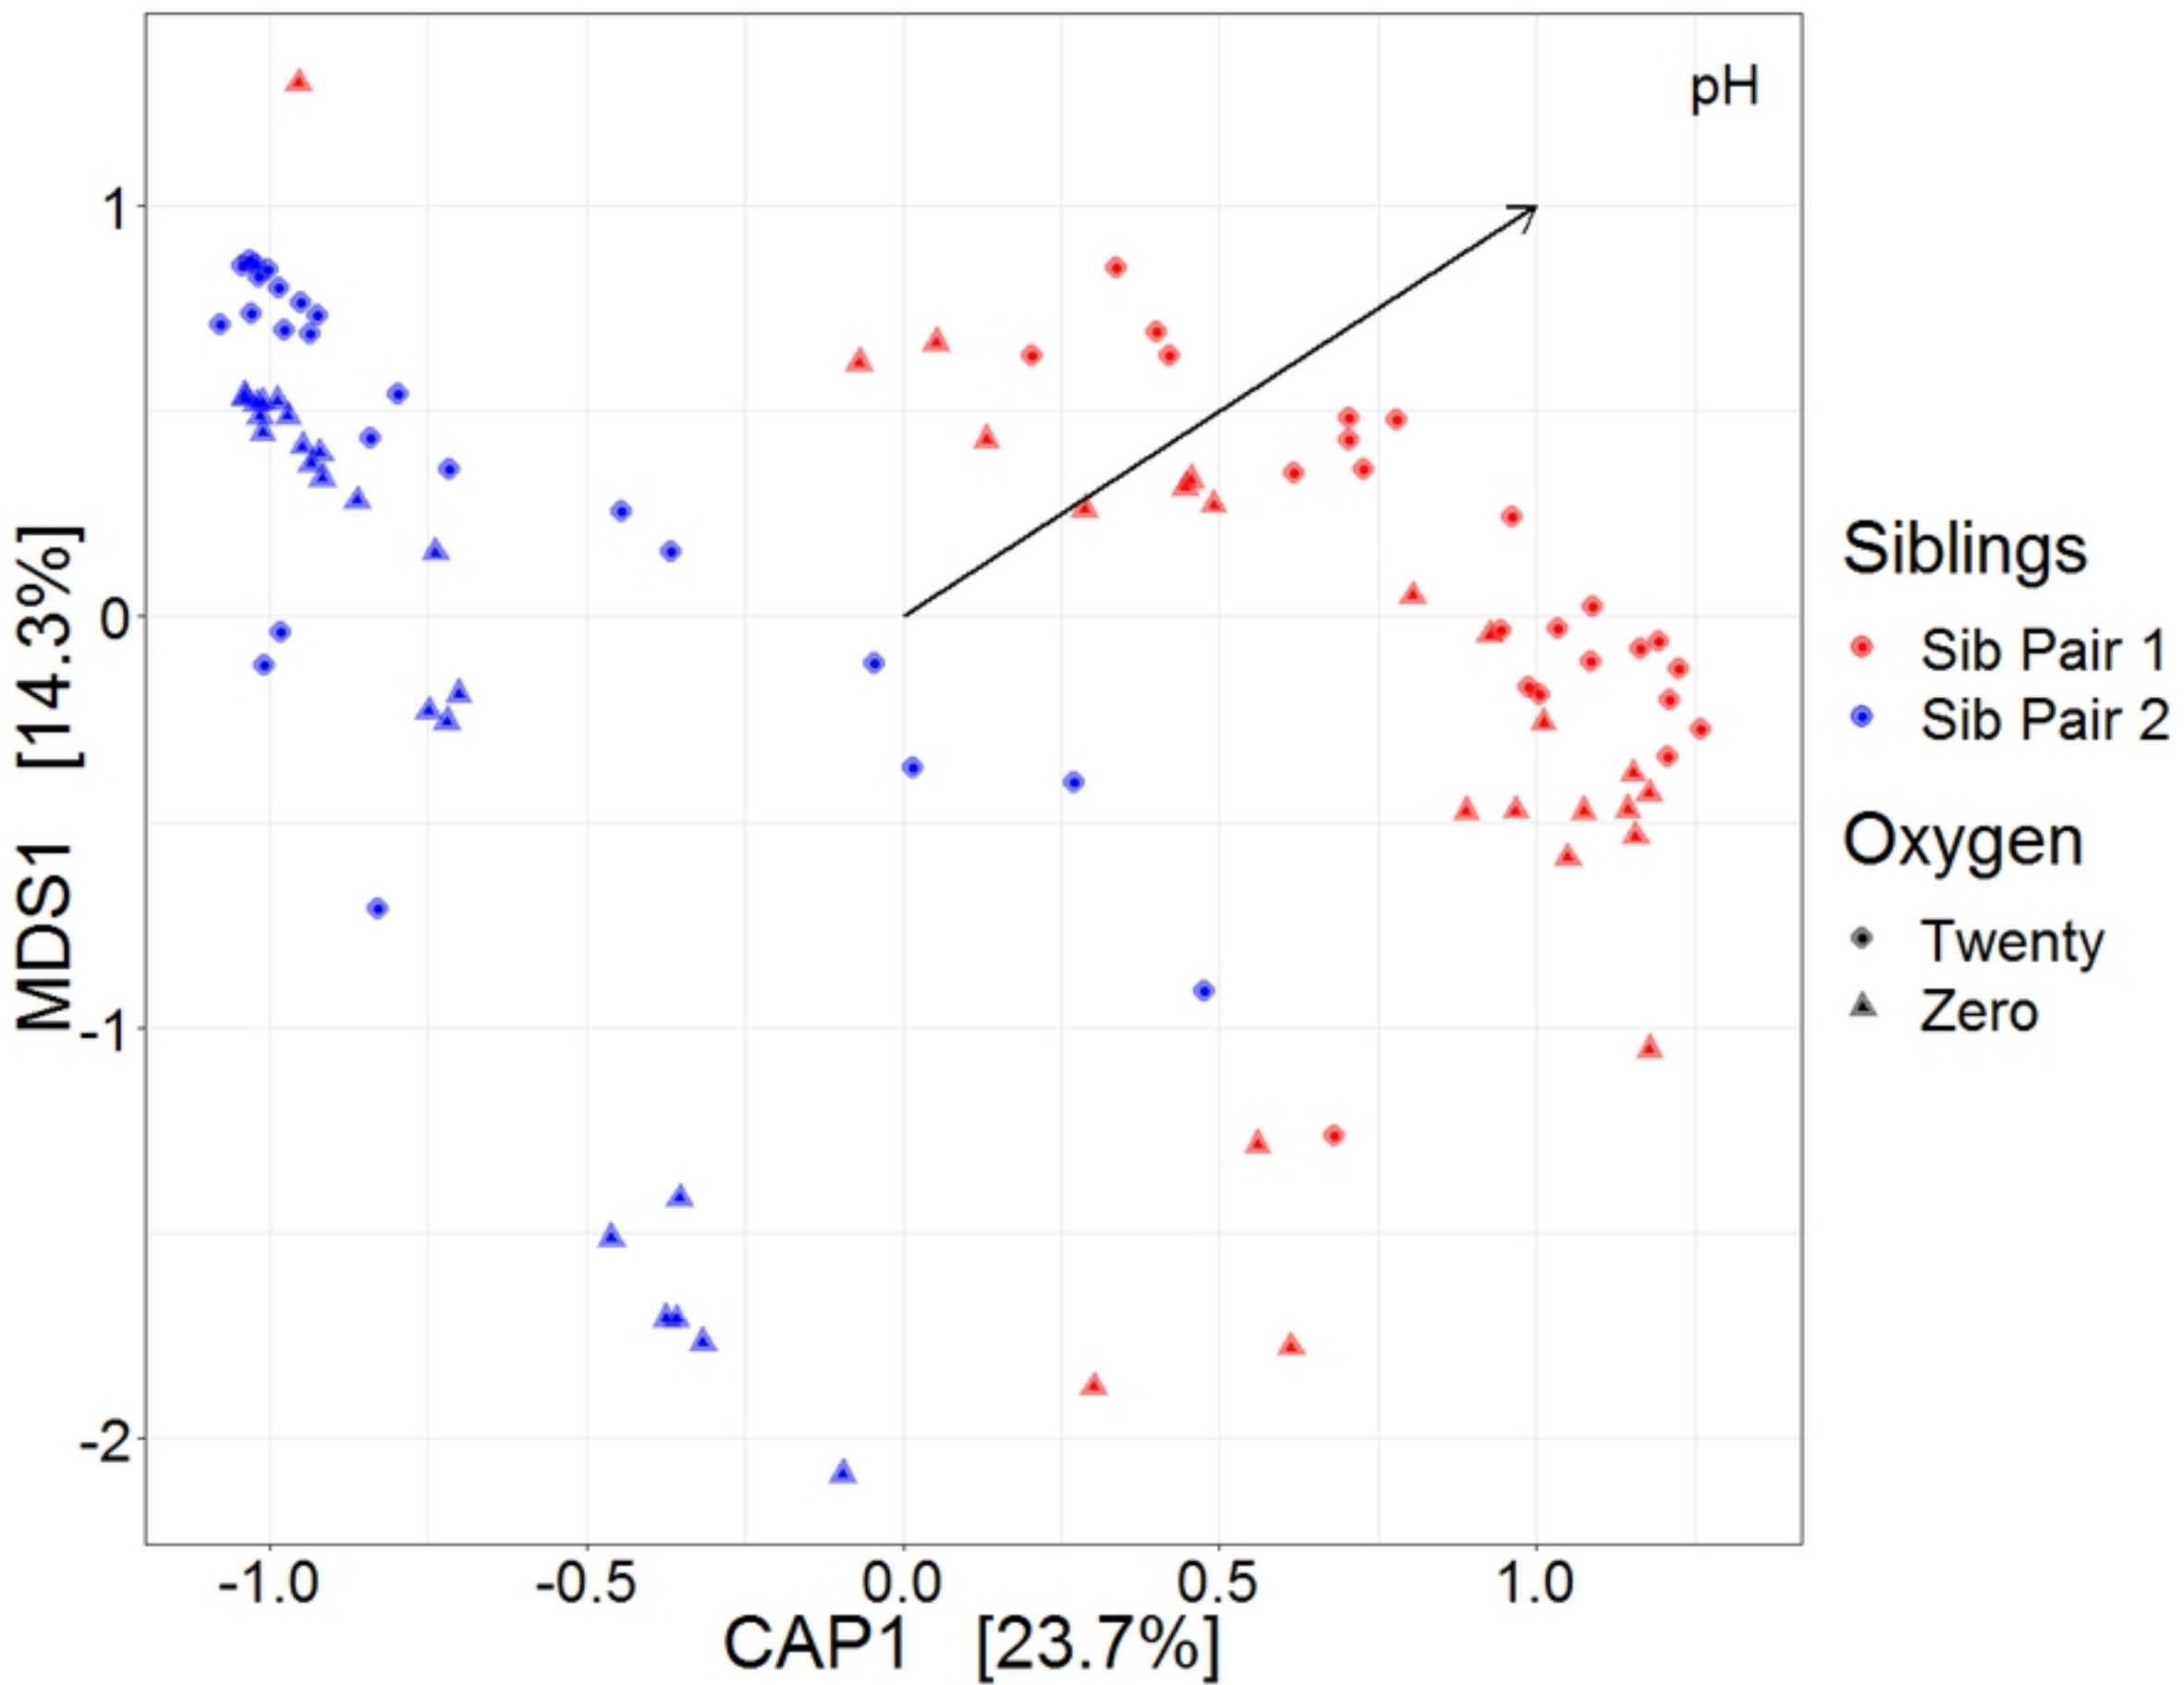

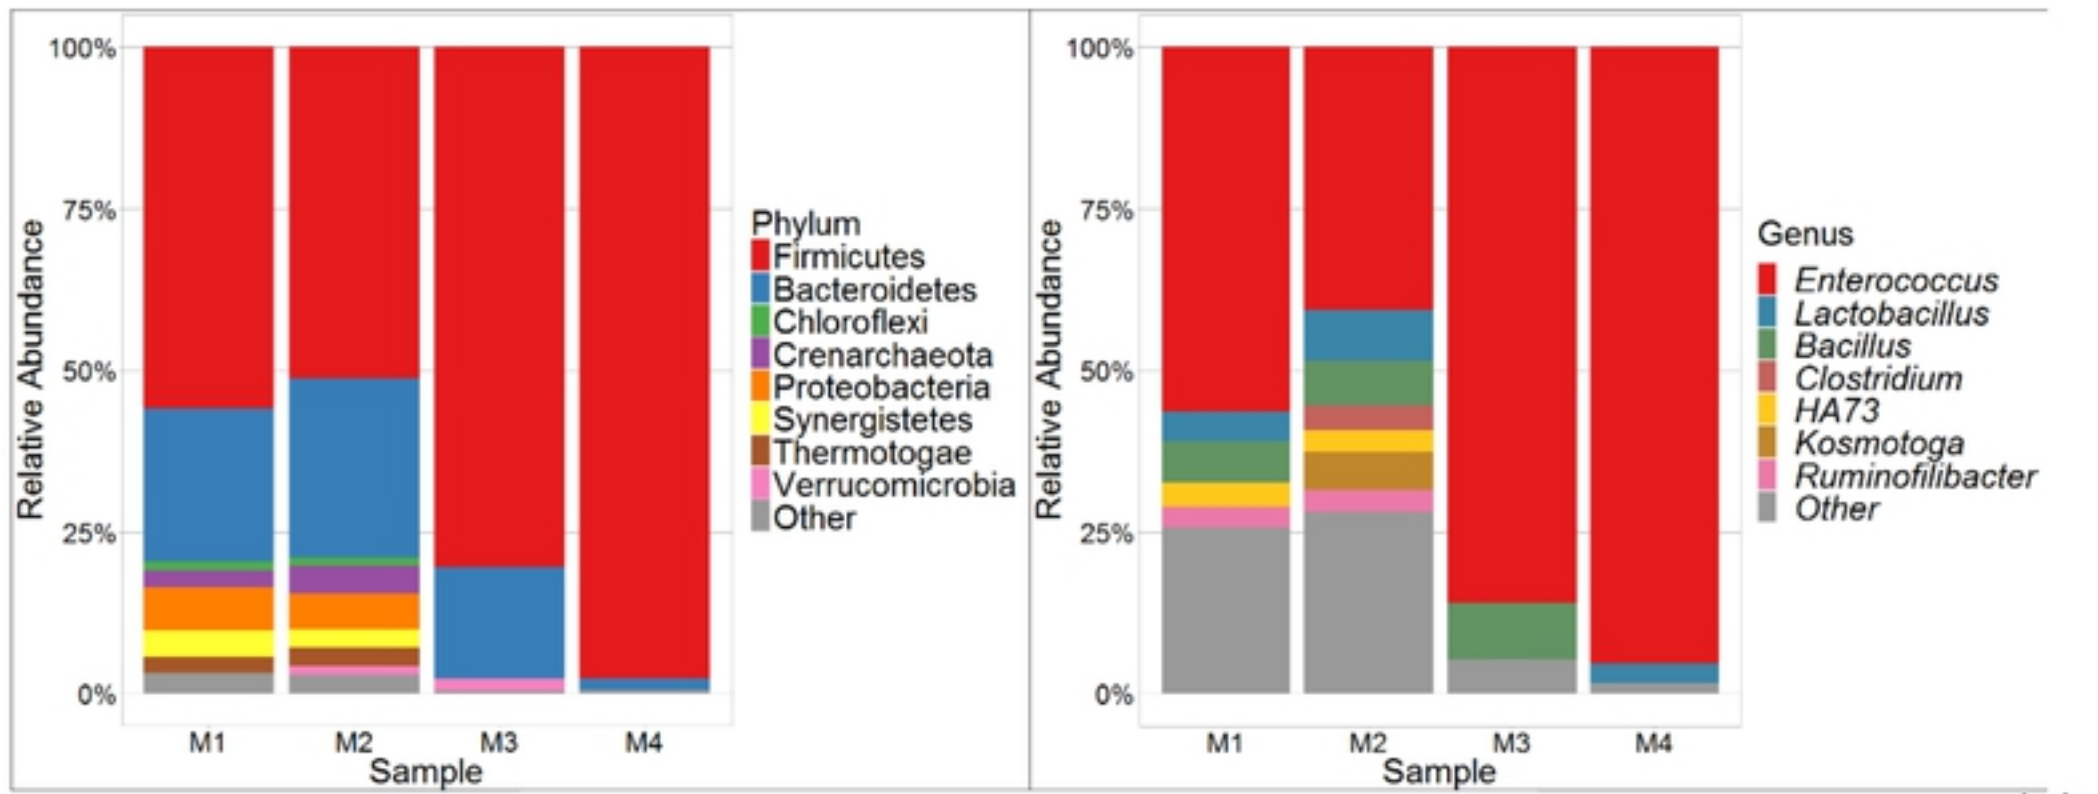

(A)

(B)

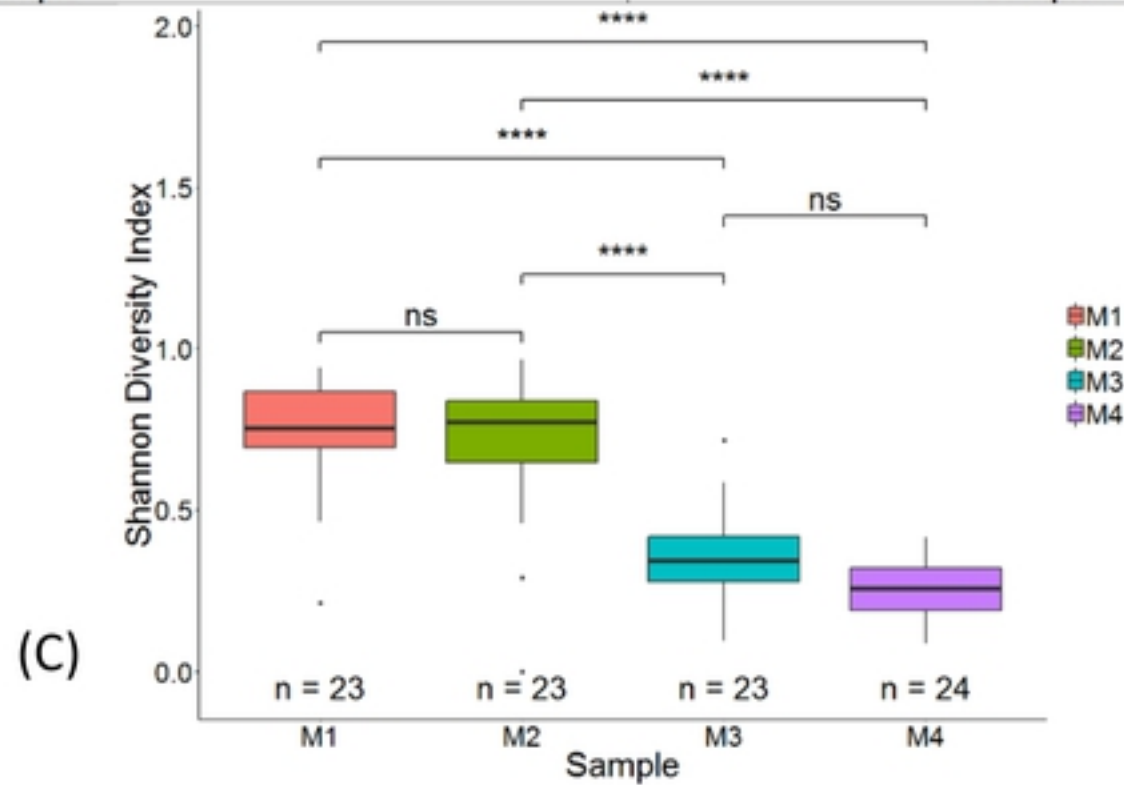

(C)

Mouse microbiome inspection

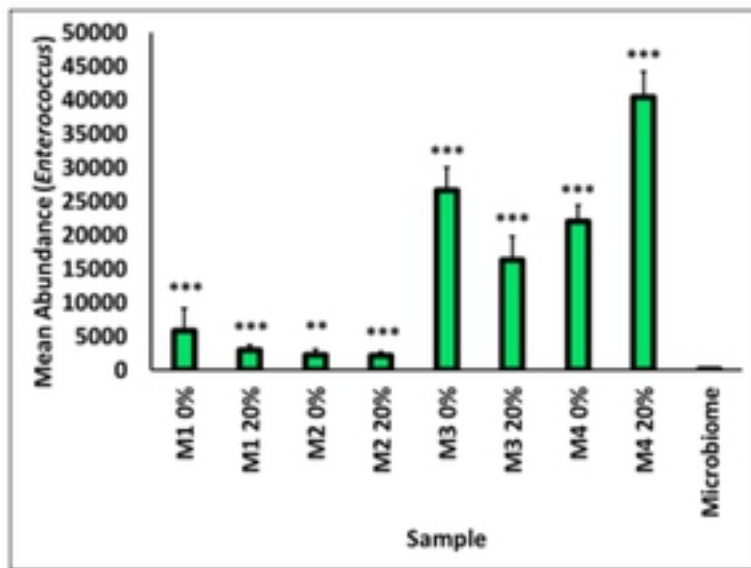

(A)

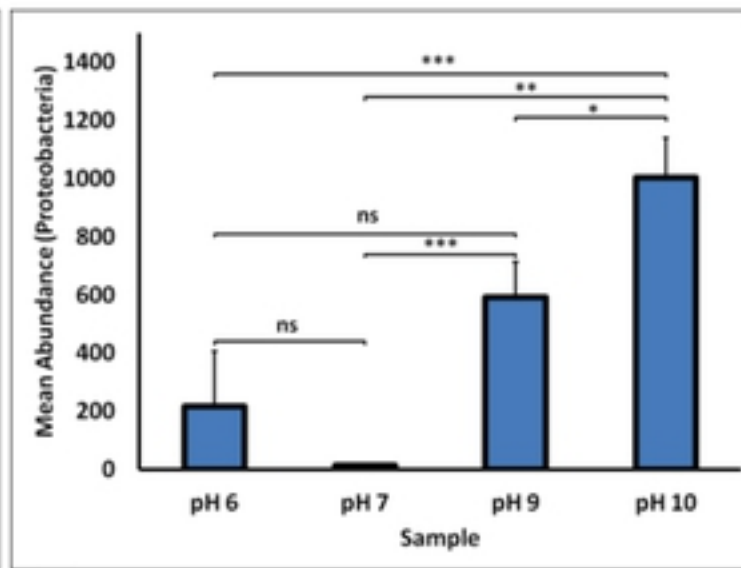

(B)

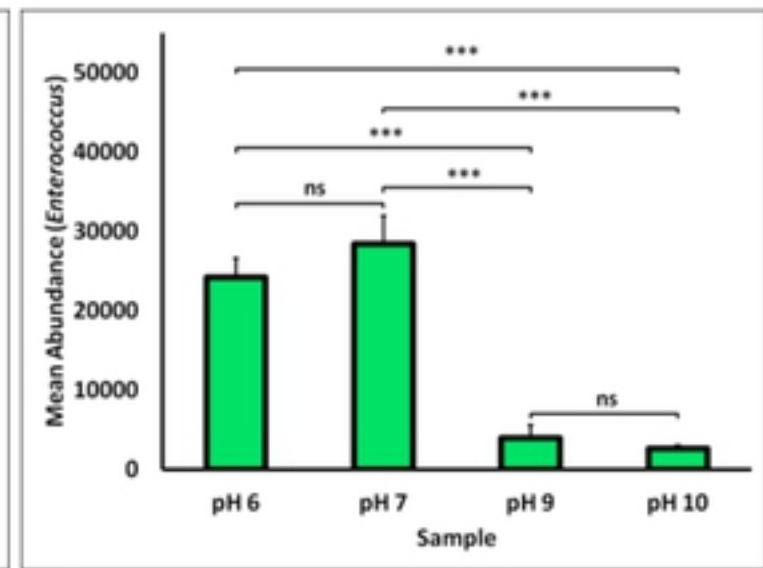

(C)

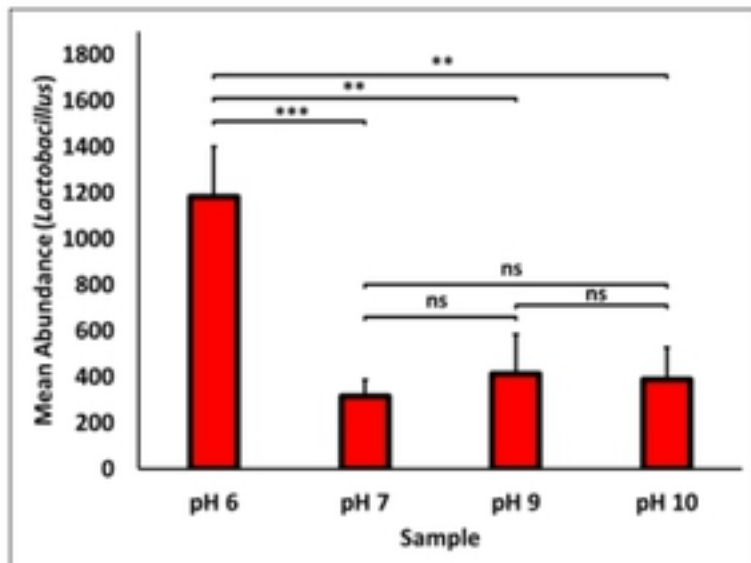

(D)

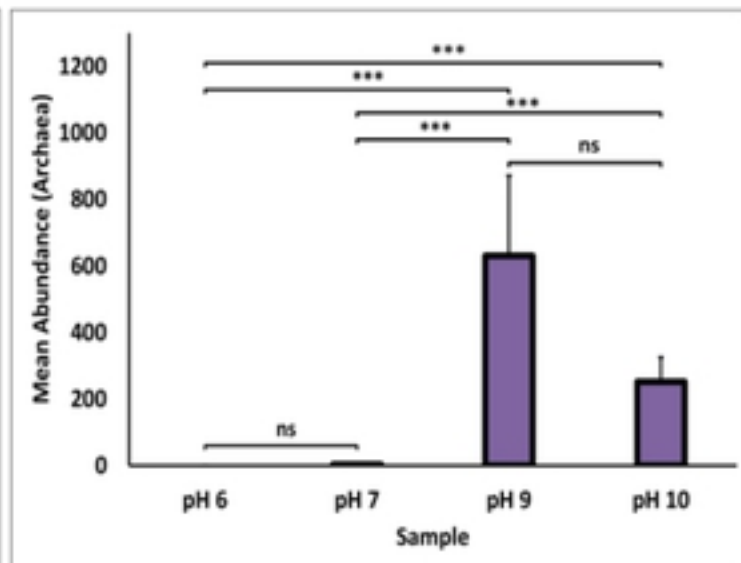

(E)

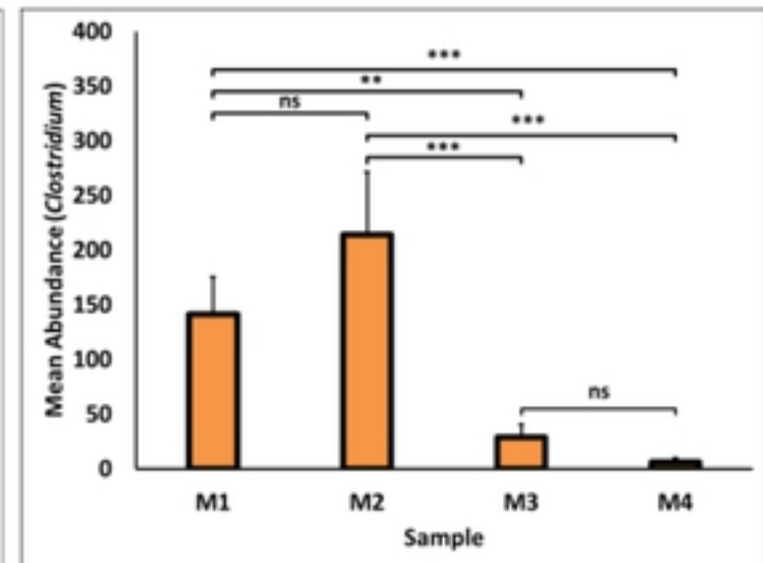

(F)

Barcharts of individual microbes

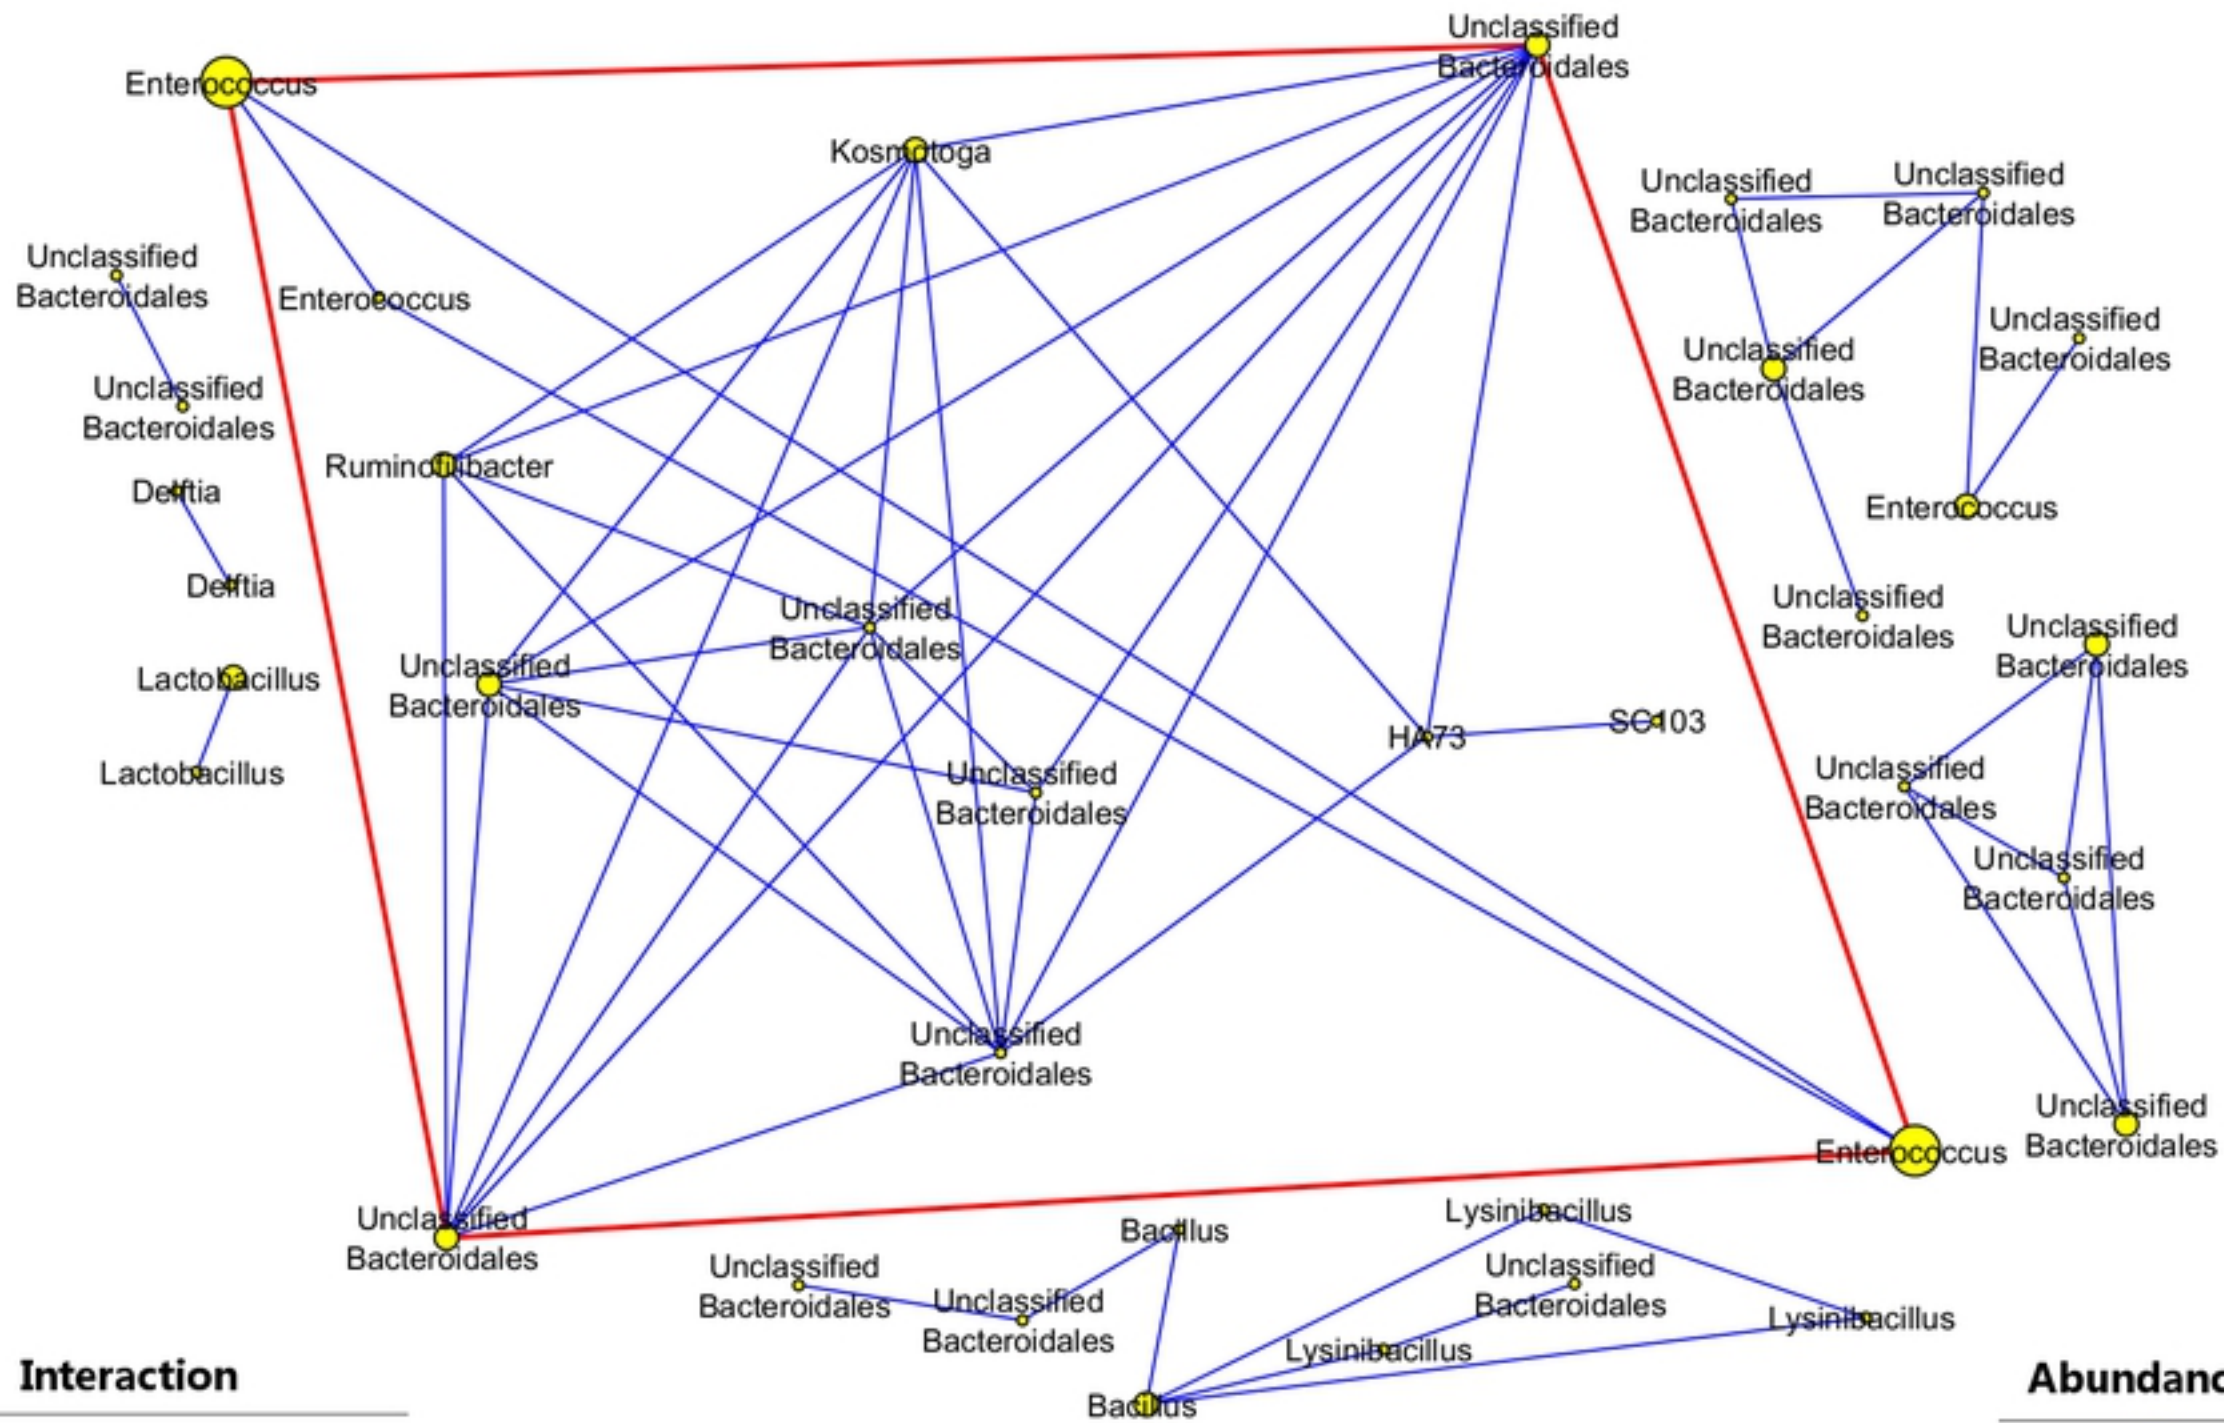

OTU network

(A)

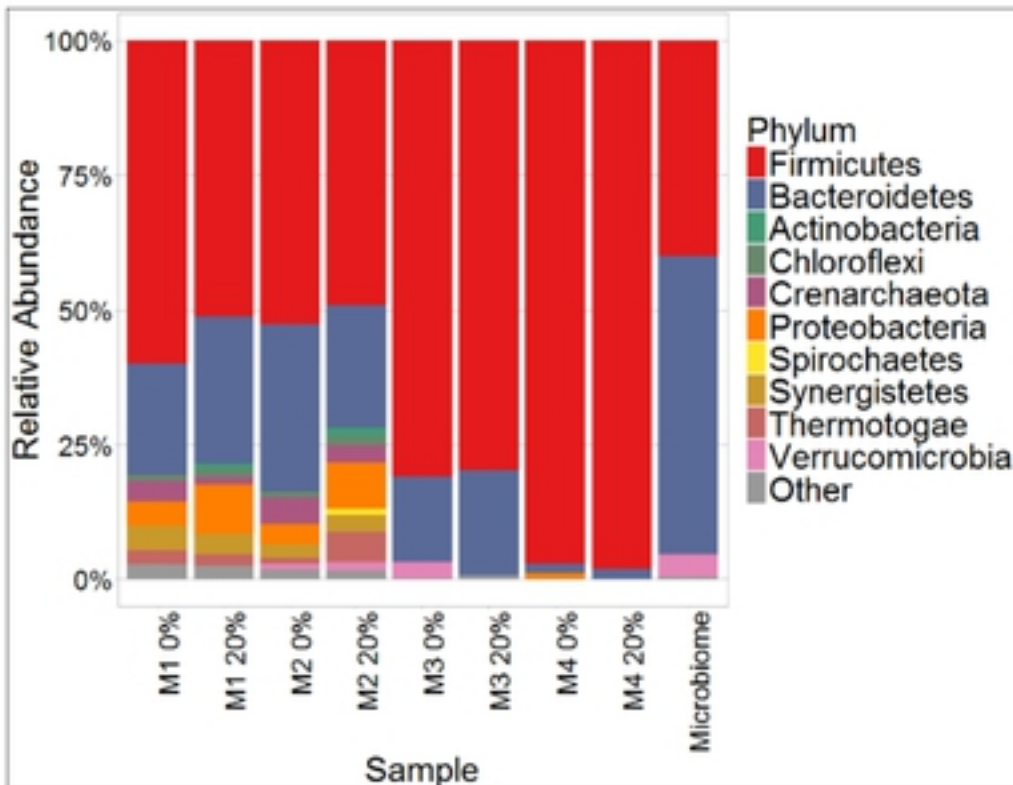

(B)

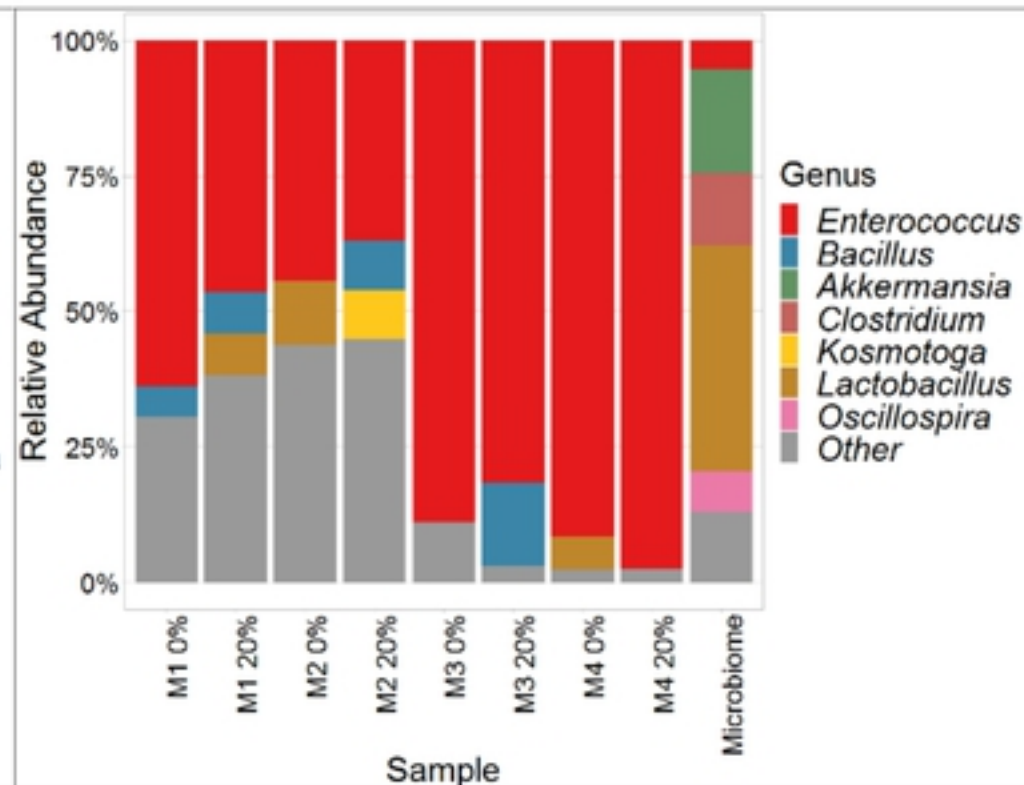

(C)

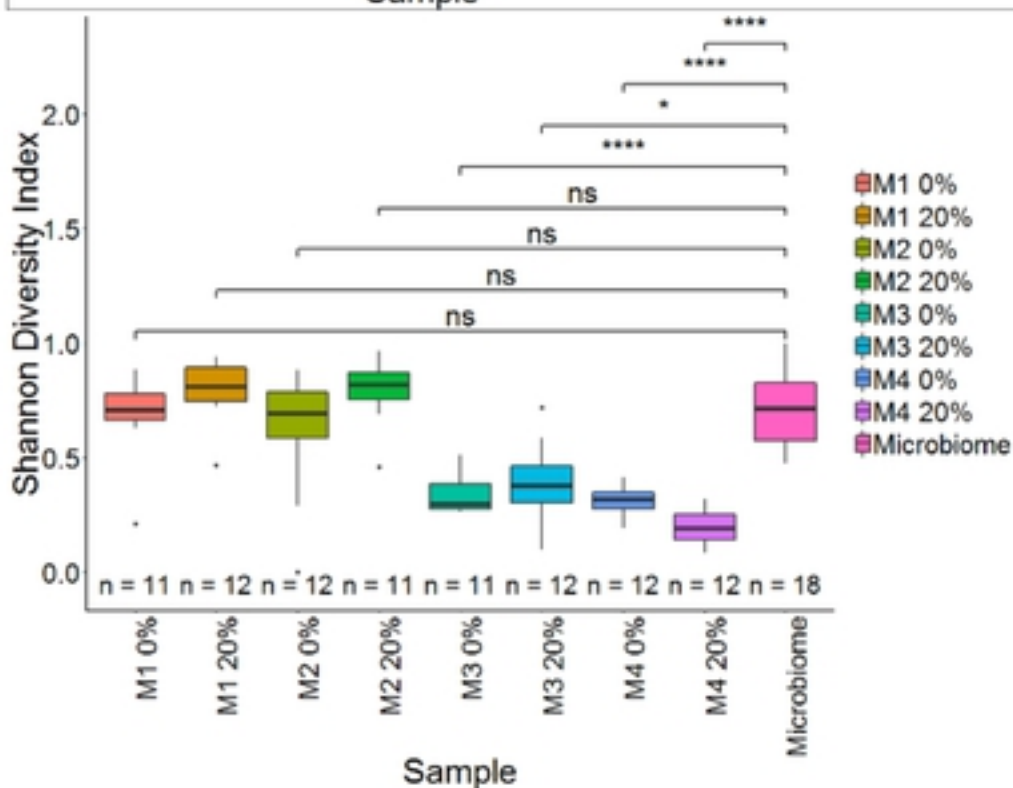

(D)

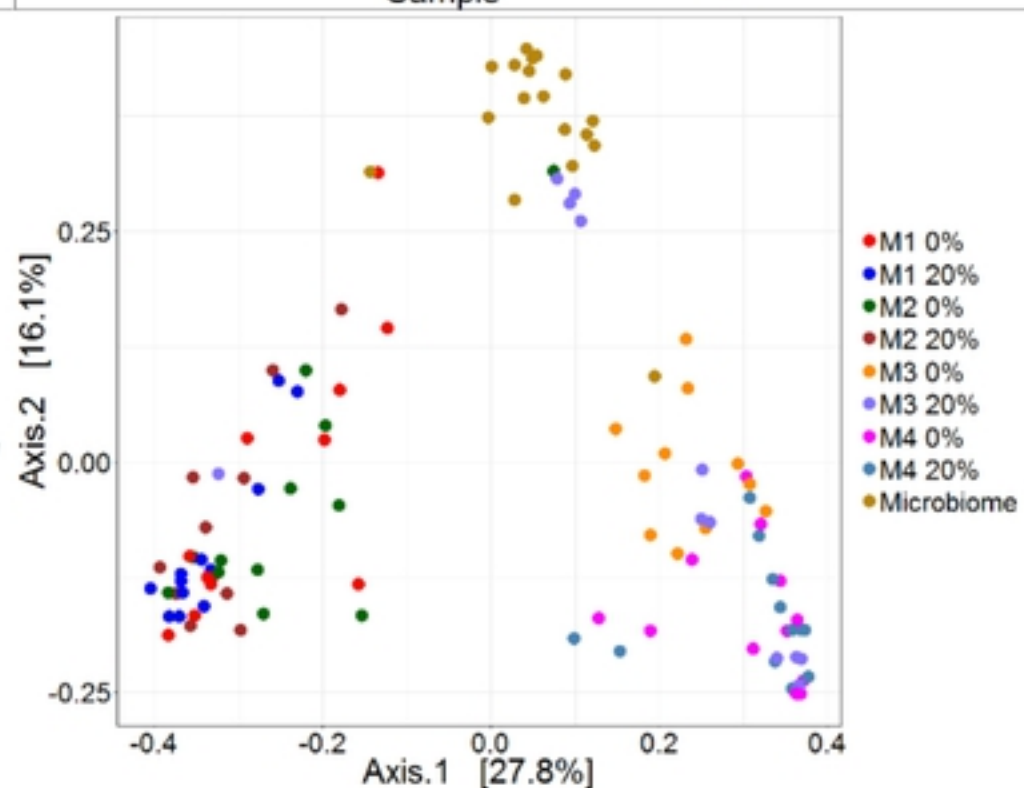

Plate microbiome inspection

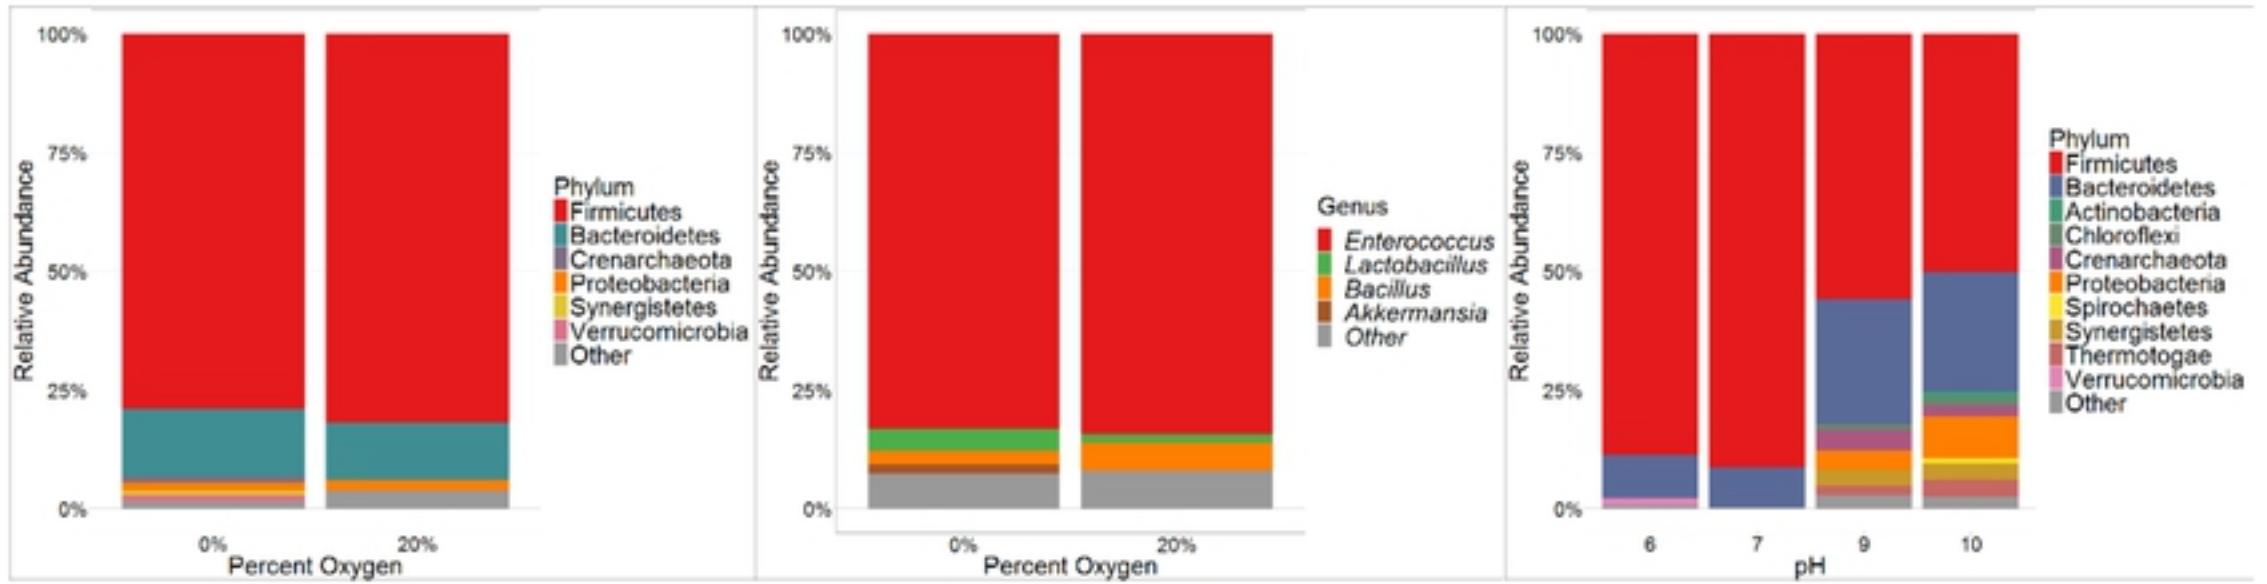

(A)

(B)

(C)

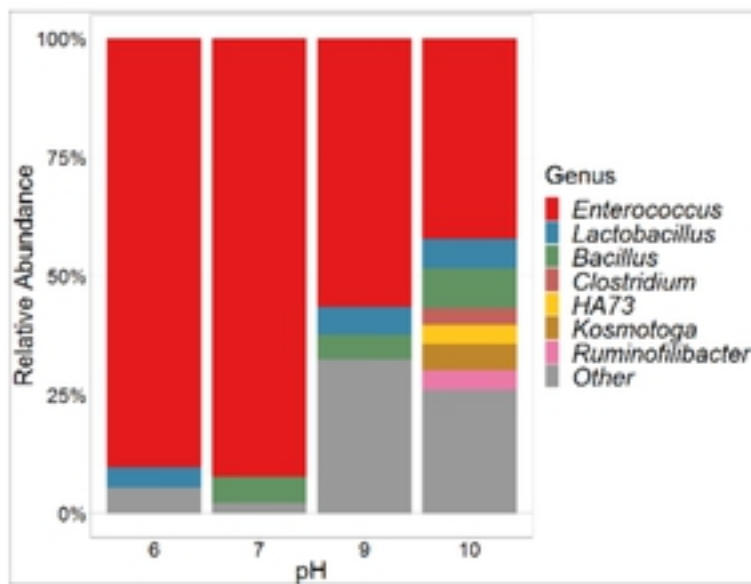

(D)

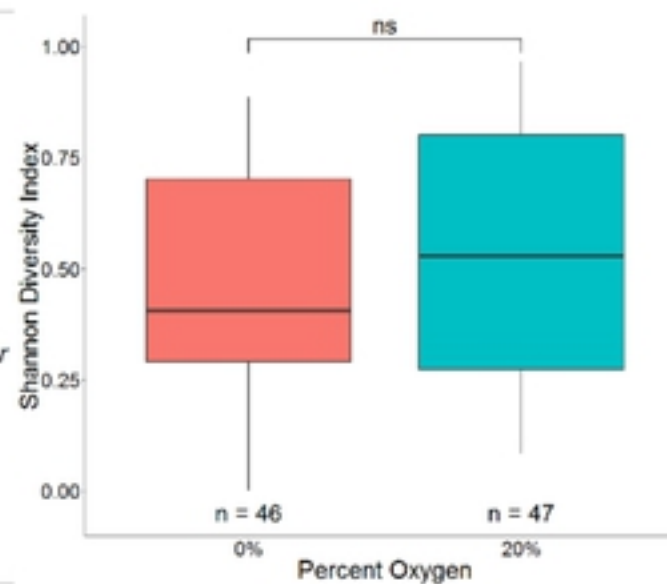

(E)

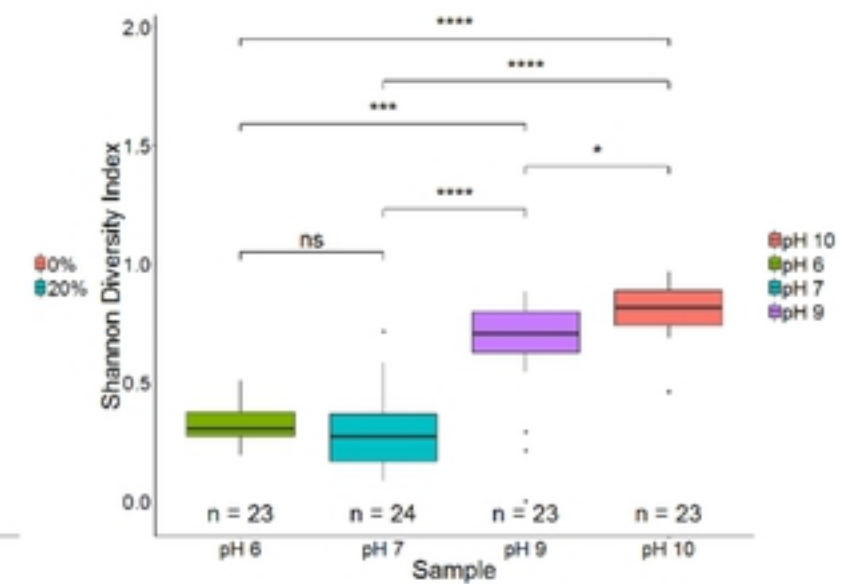

(F)

Impact of environmental variables
